# Supplementary material for: Kinetics of Direct Reaction of Vanadate, Chromate, and Permanganate with Graphene Nanoplatelets for Use in Water Purification
Source: MDPI journal article supplement (doi:10.3390/nano14020140), 2024-01-08
Supplement: s1 [file s1]

# Kinetics of Direct Reaction of Vanadate, Chromate and Permanganate with Graphene Nanoplatelets for Use in Water Purification

Daniel Konradt <sup>1,\*</sup>, Detlef Schrodén <sup>2</sup>, Ulrich Hagemann <sup>3</sup>, Markus Heidelmann <sup>3</sup>, Hans-Peter Rohns <sup>2</sup>, Christoph Wagner <sup>2</sup>, and Norbert Konradt <sup>2,\*</sup>

<sup>1</sup> Ruhr-Universität Bochum, Fakultät für Maschinenbau und Fakultät für Chemie und Biochemie, Universitätsstraße 150, 44801 Bochum; Germany

<sup>2</sup> Department of Waterworks, Stadtwerke Düsseldorf AG, Wiedfeld 50, 40589 Düsseldorf, Germany; dschrodén@swd-ag.de (D.S.); hprohns@swd-ag.de (H.-P.R.); cwagner@swd-ag.de (C.W.)

<sup>3</sup> ICAN, NETZ Building, Carl-Benz-Straße 199, 47057 Duisburg; ulrich.hagemann@uni-due.de (U.H.); markus.heidelmann@uni-due.de (M.H.)

\* Correspondence: daniel.konradt@rub.de (D.K.); nkonradt@swd-ag.de (N.K.)

## S1. Reagents for ICP-MS analytics.

| Substance                                                                                                                              | Supplier                                                                       | Product numbers |
|----------------------------------------------------------------------------------------------------------------------------------------|--------------------------------------------------------------------------------|-----------------|
| Nitric acid 65%, suprapur                                                                                                              | Merck                                                                          | 1.00456.1000    |
| SPETEC 169 calibration standard, 2% HNO <sub>3</sub> , elements<br>Cu, Zn, As, Ba, Co, Cr, Li, Ni, Pb, Se, Sr, Ti, Be, Ag, Cd,<br>U, V | SPETEC                                                                         | J2-MEB562067    |
| SPETEC 170 calibration standard, 2% HNO <sub>3</sub> , elements<br>Al, Fe, Mn                                                          | SPETEC                                                                         | J2-MEB562060    |
| SPETEC 171 calibration standard, 2% HNO <sub>3</sub> , elements<br>Ca, Na, K, Mg, B                                                    | SPETEC                                                                         | J2-MEB562065    |
| SPETEC 172 calibration standard, 2% HNO <sub>3</sub> , elements<br>Si, P                                                               | SPETEC                                                                         | J2-MEB562069    |
| Certified Reference Material, Hard Drinking Water UK<br>- Metals                                                                       | LGC                                                                            | LGC6026         |
| Deionized water, >18.2 MΩ/cm made with Purelab<br>Classic                                                                              | ELGA LabWater Veolia Water<br>Technologies Deutschland<br>GmbH, Celle, Germany |                 |

## S2. Analytical characteristics of ICP-MS analytics.

| Calibration parameter <sup>1</sup>  | Chromium,<br>total | Vanadium,<br>total | Manganese,<br>total |
|-------------------------------------|--------------------|--------------------|---------------------|
| Quantification mass (amu)           | 52                 | 51                 | 55                  |
| Calibration range (µg/L)            | 0.5-24.0           | 0.5-16.0           | 3-120               |
| Detection limit (µg/L)              | 0.6                | 0.4                | 1.7                 |
| Limit of quantitation (µg/L)        | 1.2                | 0.9                | 3.9                 |
| Variation coefficient of method (%) | 1.7                | 1.1                | 1.1                 |
| Correlation coefficient             | 0.9998             | 0.9998             | 0.9999              |
| Relative combined uncertainty (%)   | 4.6                | 3.3                | 4.4                 |

<sup>1</sup> Linear calibration evaluation

### S3. Analytical characteristics of UV-vis measurements.

#### Linear calibration evaluation

| Calibration parameters              | K <sub>2</sub> CrO <sub>4</sub> , DW <sup>1</sup> | K <sub>2</sub> CrO <sub>4</sub> ,<br>5 mM NH <sub>4</sub> Cl, pH 7.5 |
|-------------------------------------|---------------------------------------------------|----------------------------------------------------------------------|
| Cuvette (cm)                        | 5                                                 | 5                                                                    |
| Wavelength (nm)                     | 375                                               | 375                                                                  |
| Function                            | 2.389 x + 0.00095                                 | 2.124 x + 0.00182                                                    |
| Calibration range (mmol/L)          | 0.005 - 0.045                                     | 0.005 - 0.045                                                        |
| Detection limit (mmol/L)            | 0.001                                             | 0.001                                                                |
| Limit of quantitation (mmol/L)      | 0.003                                             | 0.003                                                                |
| Variation coefficient of method (%) | 2.36                                              | 3.20                                                                 |
| Correlation coefficient             | 0.9995                                            | 0.9990                                                               |

<sup>1</sup> DW: Drinking water

| Calibration parameters              | K <sub>2</sub> CrO <sub>4</sub> , DW | K <sub>2</sub> CrO <sub>4</sub> ,<br>5 mM NH <sub>4</sub> Cl, pH 7.5 |
|-------------------------------------|--------------------------------------|----------------------------------------------------------------------|
| Cuvette (cm)                        | 5                                    | 5                                                                    |
| Wavelength (nm)                     | 375                                  | 375                                                                  |
| Function                            | 2.389 x + 0.00095                    | 2.124 x + 0.00182                                                    |
| Calibration range (mmol/L)          | 0.005 - 0.045                        | 0.005 - 0.045                                                        |
| Detection limit (mmol/L)            | 0.001                                | 0.001                                                                |
| Limit of quantitation (mmol/L)      | 0.003                                | 0.003                                                                |
| Variation coefficient of method (%) | 2.36                                 | 3.20                                                                 |
| Correlation coefficient             | 0.9995                               | 0.9990                                                               |

| Calibration parameters              | KMnO <sub>4</sub> , DW | KMnO <sub>4</sub> ,<br>3.1 mM Na <sub>2</sub> SO <sub>4</sub> , pH 7.5 |
|-------------------------------------|------------------------|------------------------------------------------------------------------|
| Cuvette (cm)                        | 5                      | 5                                                                      |
| Wavelength (nm)                     | 525                    | 525                                                                    |
| Function                            | 1.157 x + 0.0018       | 1.207 x + 0.0052                                                       |
| Calibration range (mmol/L)          | 0.005 - 0.04           | 0.005 - 0.04                                                           |
| Detection limit (mmol/L)            | 0.001                  | 0.001                                                                  |
| Limit of quantitation (mmol/L)      | 0.003                  | 0.003                                                                  |
| Variation coefficient of method (%) | 2.4                    | 3.1                                                                    |
| Correlation coefficient             | 0.9995                 | 0.9991                                                                 |

#### S4. Dependence of the UV-vis absorption bands on the pH value.

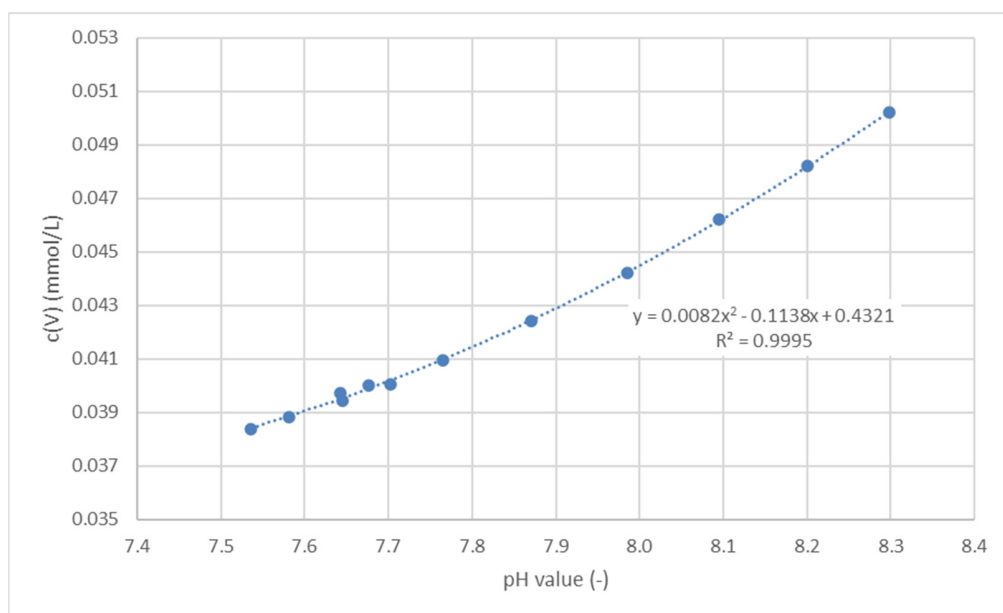

Dependence of the vanadium(V) absorption at 263 nm in DW, expressed as concentration as a function of pH.

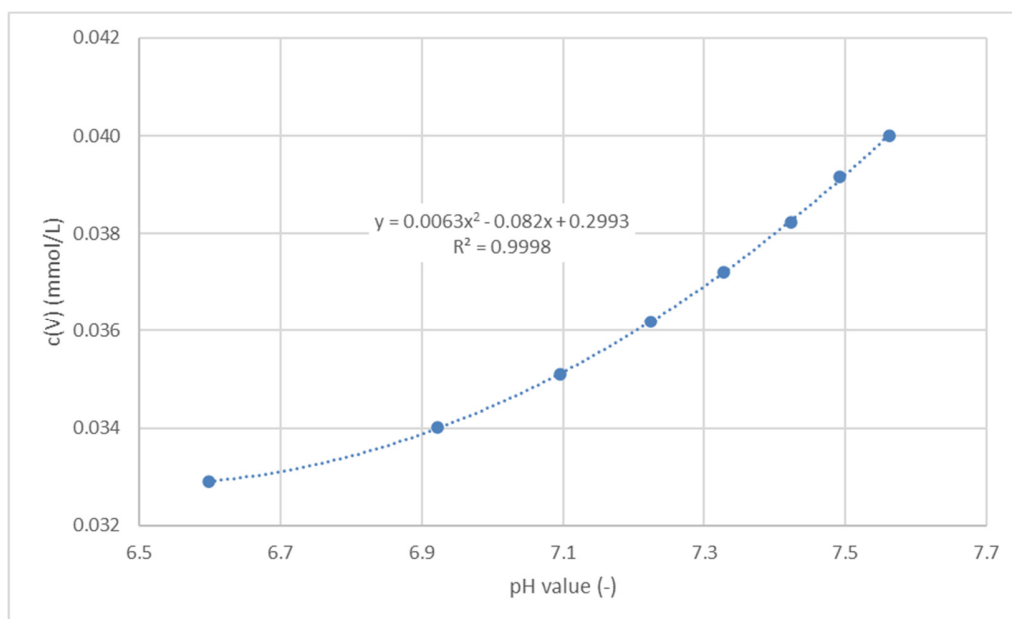

Dependence of the vanadium(V) absorption at 263 nm in 5 mM  $\text{NH}_4\text{Cl}$ , expressed as concentration as a function of pH.

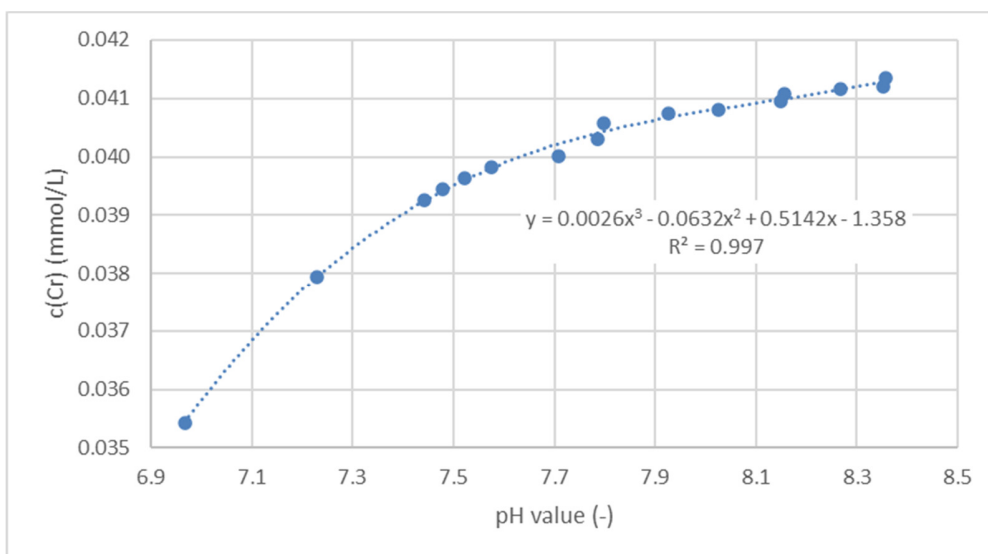

Dependence of the chromium(VI) absorption at 375 nm in DW, expressed as concentration (0.04 mM at pH 7.70) as a function of the pH.

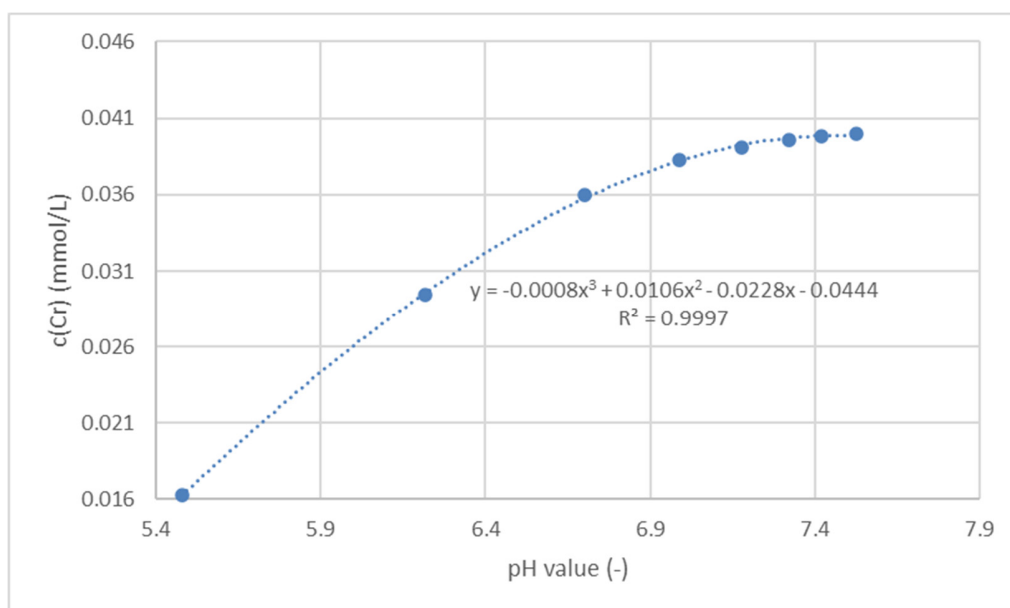

Dependence of the chromium(VI) absorption at 375 nm in 5 mM  $\text{NH}_4\text{Cl}$ , expressed as concentration as a function of pH.

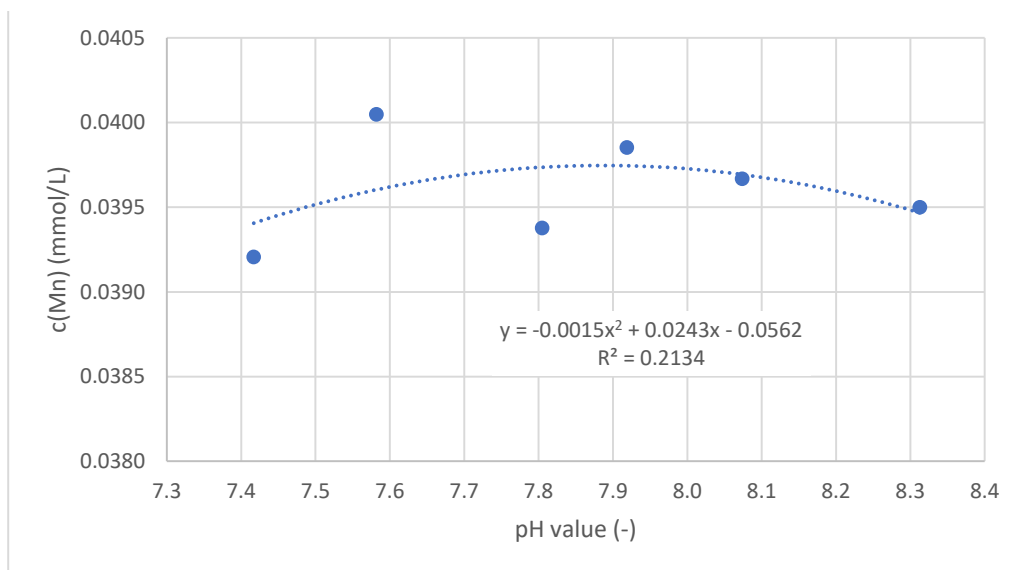

Dependence of the manganese(VII) absorption at 525 nm in DW, expressed as concentration as a function of pH.

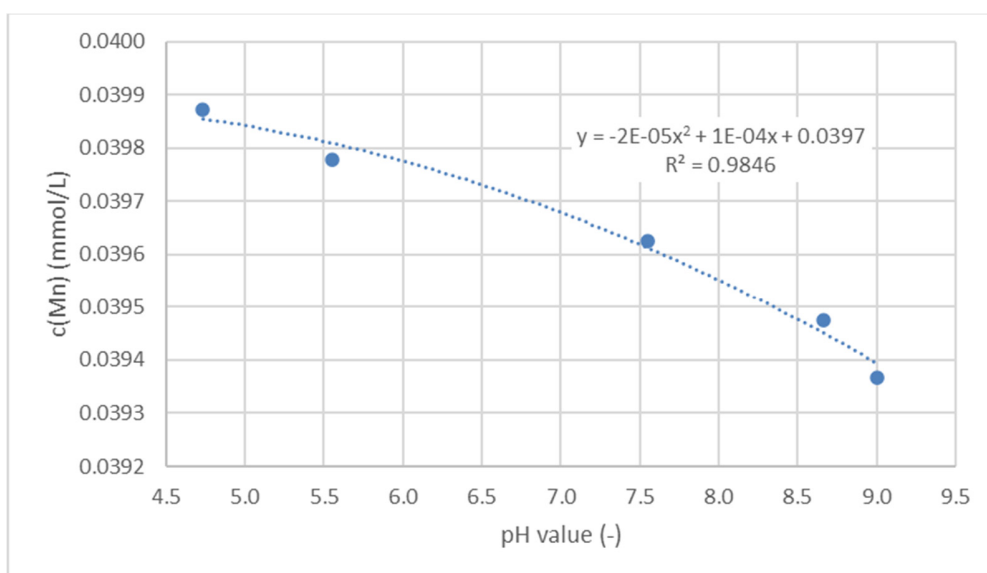

Dependence of the manganese(VII) absorption at 525 nm in 3.1 mM Na<sub>2</sub>SO<sub>4</sub>, expressed as concentration as a function of pH.

### S5. Elemental analysis of GNP and metal-decorated GNP.

| Sample                                                      | C (%) | H (%) | N (%) | S (%) | K (%) | Mg (%) | Ca (%) | V (%) | Cr (%) | Mn (%) | O2, calc (%) | drying loss (%) |
|-------------------------------------------------------------|-------|-------|-------|-------|-------|--------|--------|-------|--------|--------|--------------|-----------------|
| GNP                                                         | 89.21 | 0.57  | 0.89  | 0.07  | 0.04  | 0.03   | 0.06   |       |        |        | 9.13         | 7.71            |
| GNP reg                                                     | 89.35 | 0.51  | 1.04  | 0.13  | 0.03  | 0.03   | 0.06   |       |        |        | 8.85         | 2.24            |
| GNP/(NH <sub>4</sub> )VO <sub>3</sub> in DW                 | 88.42 | 0.62  | 0.88  | 0.08  | 0.04  | 0.06   | 0.53   | 0.04  |        |        | 9.33         | 10.16           |
| GNP reg/(NH <sub>4</sub> )VO <sub>3</sub> in DW             | 89.31 | 0.59  | 0.94  | 0.08  | 0.06  | 0.03   | 0.08   | 0.21  |        |        | 8.70         | 8.09            |
| GNP/(NH <sub>4</sub> )VO <sub>3</sub> in NH <sub>4</sub> Cl | 89.86 | 0.48  | 0.97  | 0.08  | 0.04  | 0.03   | 0.08   | 0.07  |        |        | 8.39         | 10.29           |
| GNP/K <sub>2</sub> CrO <sub>4</sub> in DW                   | 89.49 | 0.59  | 0.87  | 0.06  | 0.08  | 0.03   | 0.09   |       | 0.11   |        | 8.68         | 8.38            |
| GNP reg/K <sub>2</sub> CrO <sub>4</sub> in DW               | 89.72 | 0.40  | 0.83  | 0.07  | 0.10  | 0.03   | 0.08   |       | 0.23   |        | 8.54         | 6.98            |
| GNP/K <sub>2</sub> CrO <sub>4</sub> in NH <sub>4</sub> Cl   | 89.61 | 0.50  | 0.95  | 0.03  | 0.07  | 0.04   | 0.10   |       | 0.11   |        | 8.59         | 39.08           |
| GNP/KMnO <sub>4</sub> in Na <sub>2</sub> SO <sub>4</sub>    | 89.23 | 0.46  | 0.87  | 0.03  | 0.08  | 0.04   | 0.09   |       |        | 1.02   | 8.18         | 45.00           |

reg: Thermally regenerated; DW: Drinking water

## S6. XPS of GNP.

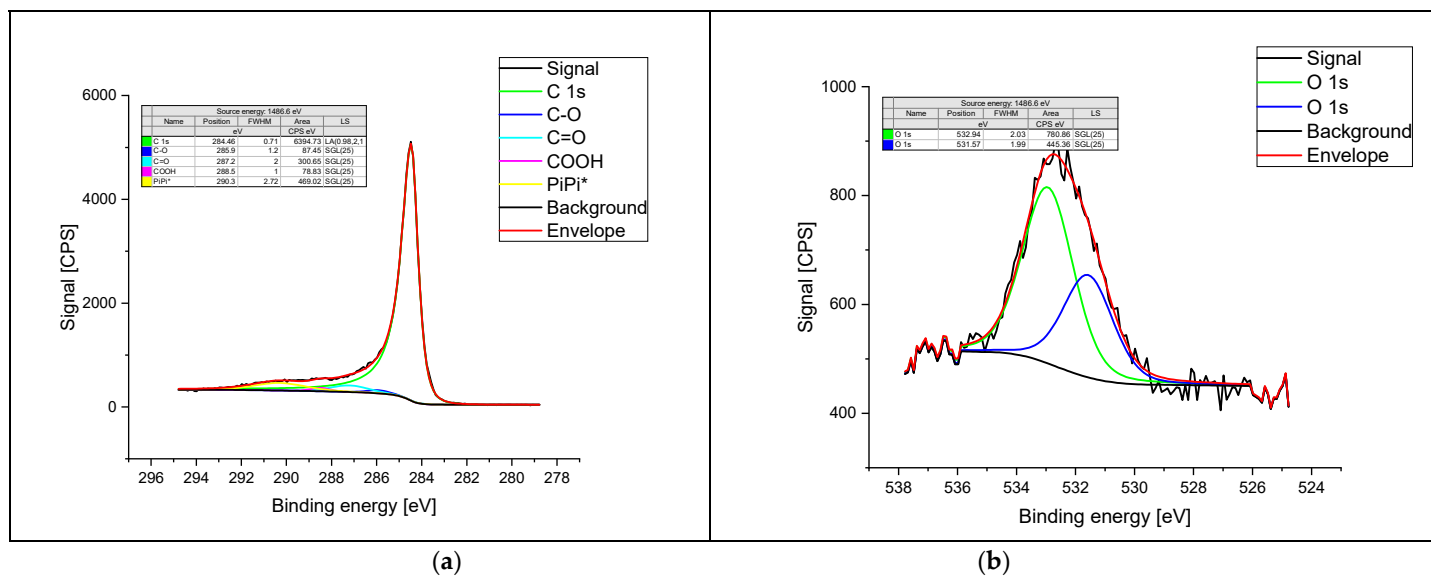

**Figure S6.** XP spectra of GNP. (a) Carbon (C 1s); (b) Oxygen (O 1s).



**S7. TEM of GNP.**

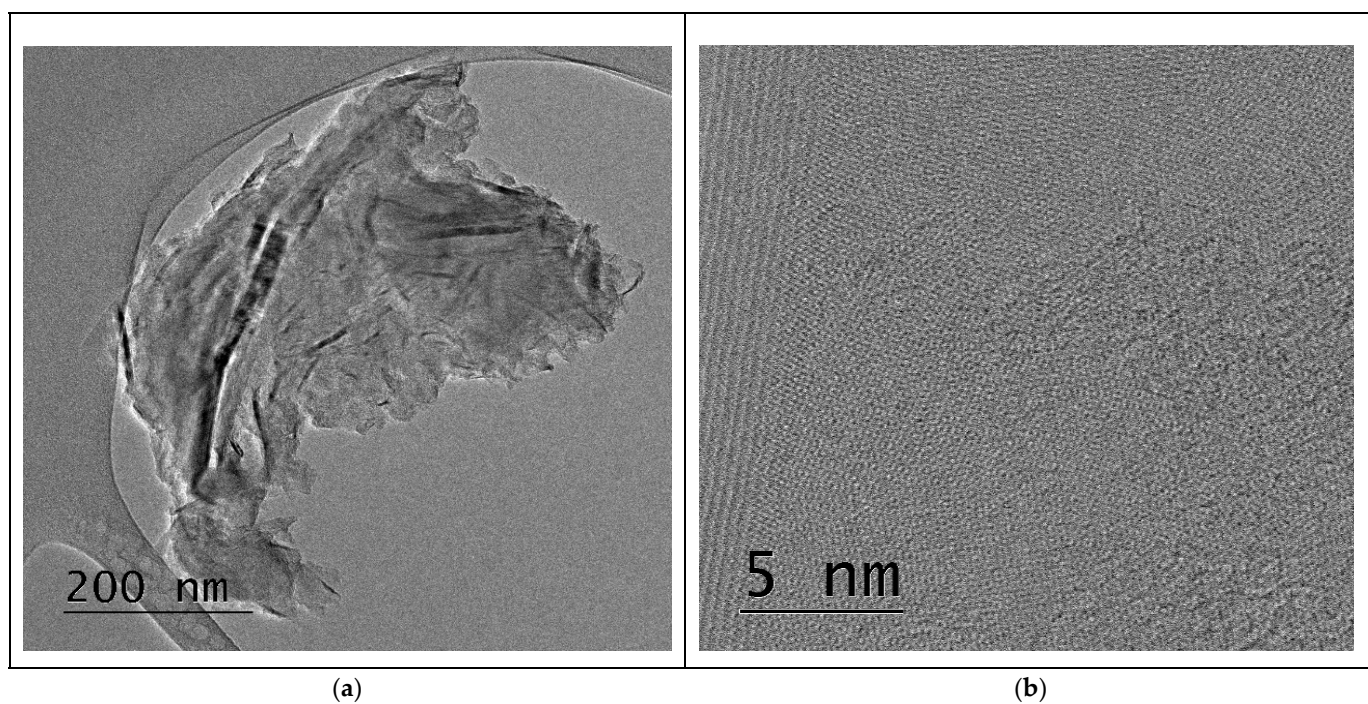

**Figure S7.** TEM of GNP. (a) Single flake; (b) Flake with 11 graphene layers and local disturbed molecular structures.

### S8. Raman spectrum of GNP.

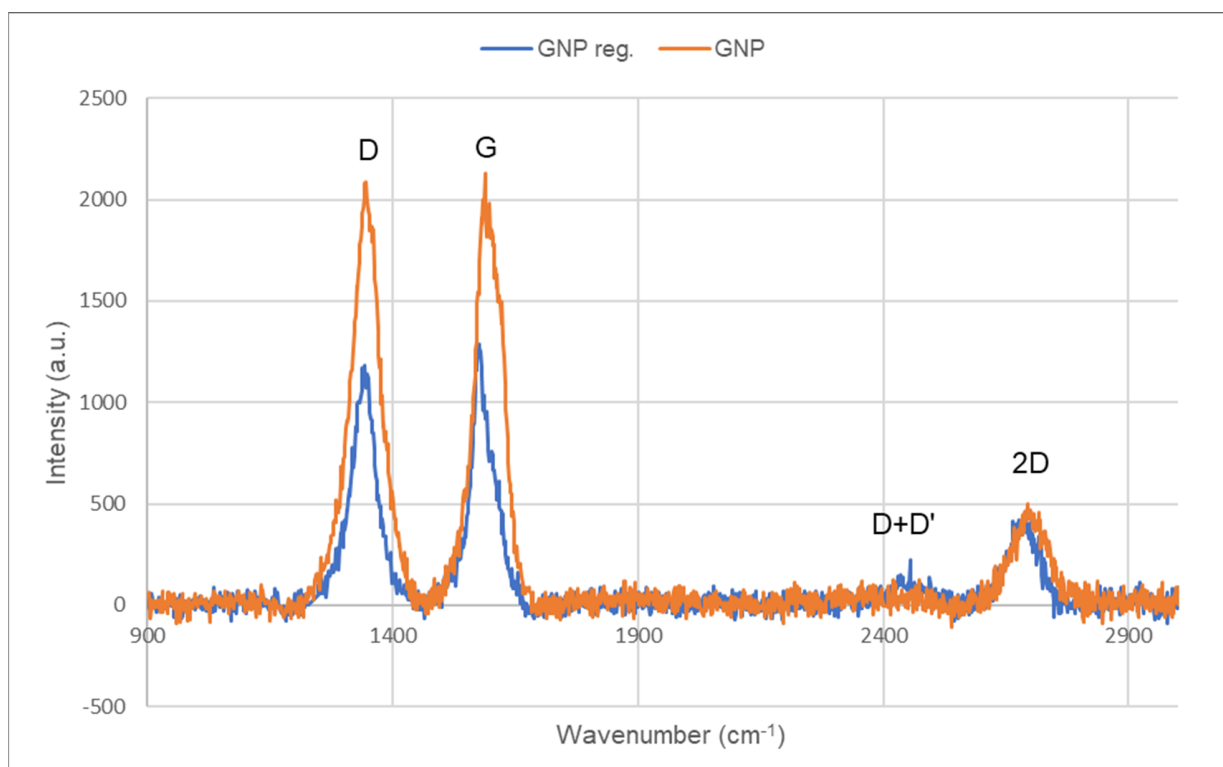

**Figure S8.** Raman of GNP and regenerated GNP.

### S9. IR spectra of GNP.

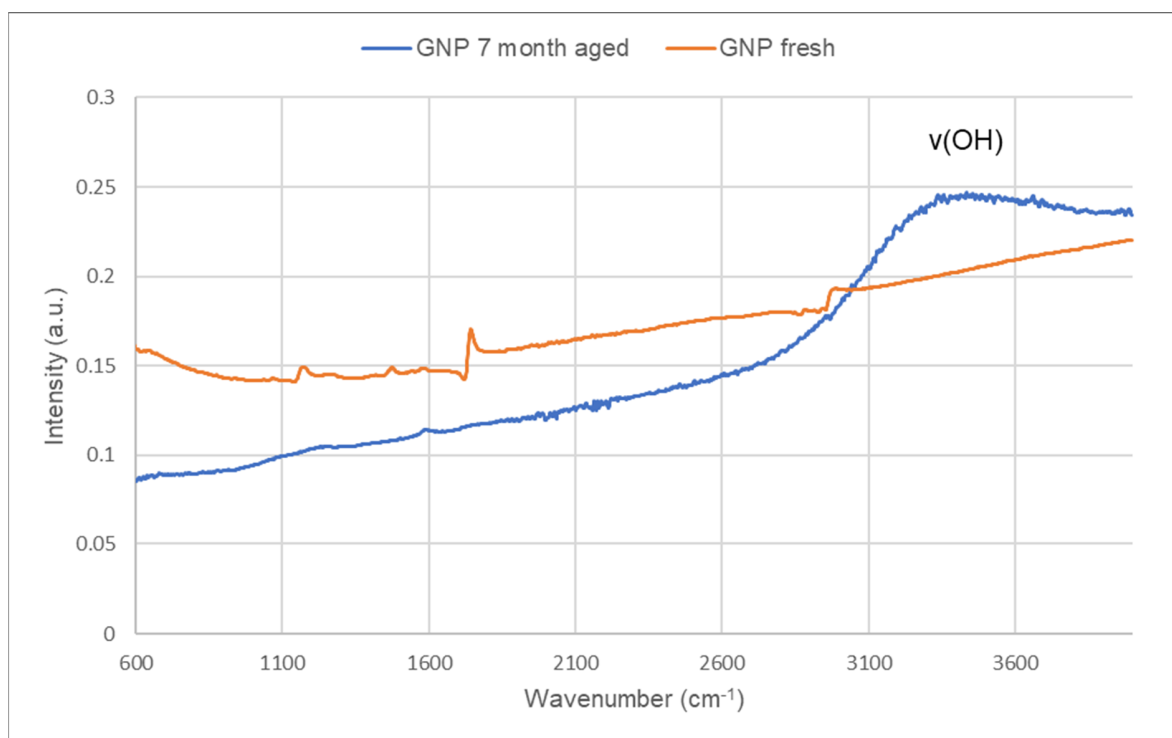

**Figure S9.** IR spectra of fresh GNP and after 7 month storage.

**S10. Weight increase of the GNP upon contact with the ambient air.**

| <b>Time( h)</b> | <b>Weight increase GNP (%)</b> |
|-----------------|--------------------------------|
| 0               | 0.00                           |
| 1               | 0.34                           |
| 2               | 0.63                           |
| 3               | 0.94                           |
| 4               | 1.18                           |
| 5               | 1.30                           |
| 6               | 1.47                           |
| 24              | 2.67                           |

### S11. Sorption kinetics of oxygen on GNP in water.

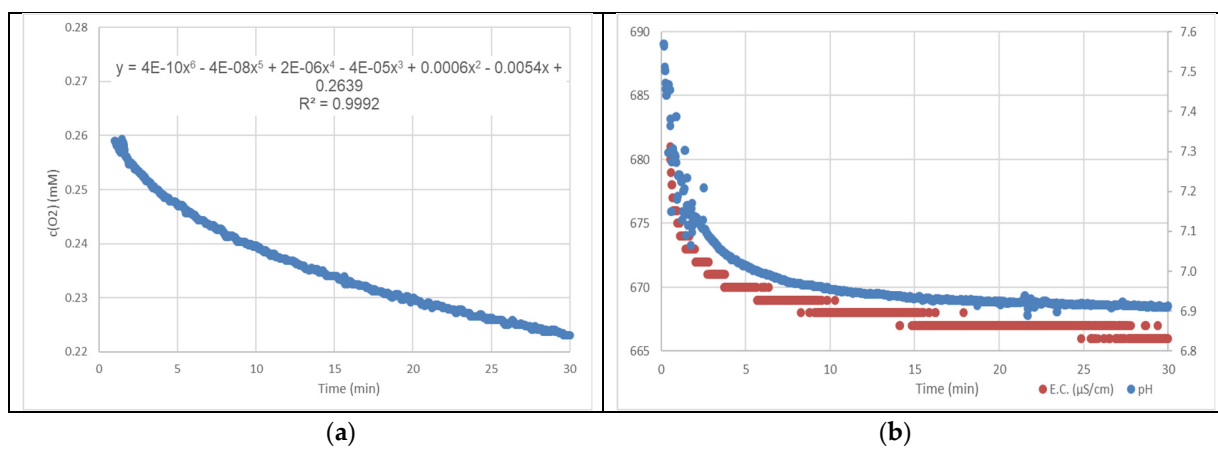

**Figure S11.1.** 0.25 mM  $O_2$  in 150 ml DW with 300 mg GNP. (a) Concentration of  $O_2$  as a function of time with empirical function; (b) E.C. and pH as a function of time, E.C. (left axis), pH (right axis).

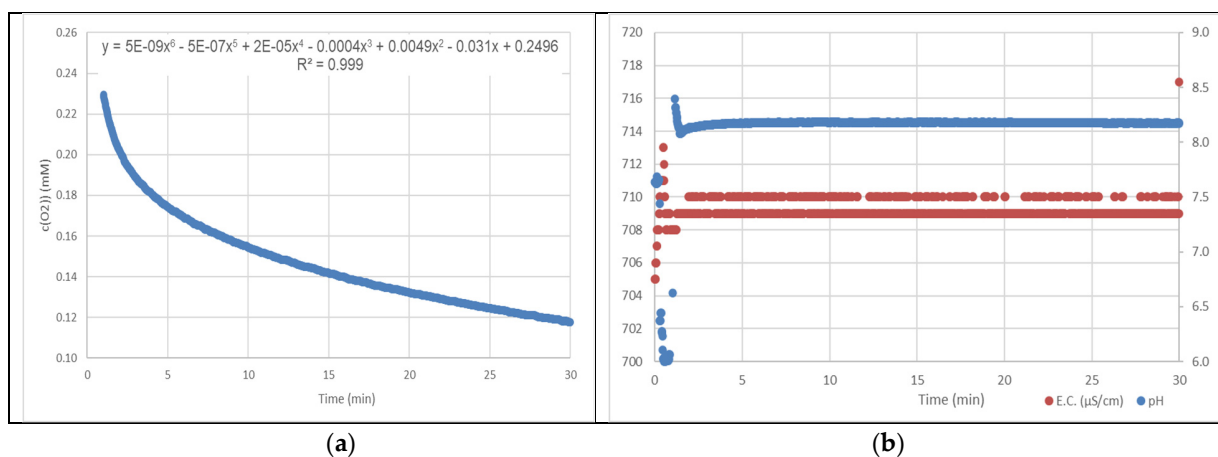

**Figure S11.2.** 0.25 mM  $O_2$  in 150 ml DW with 300 mg GNP reg. (a) Concentration of  $O_2$  as a function of time with empirical function; (b) E.C. and pH as a function of time, E.C. (left axis), pH (right axis).

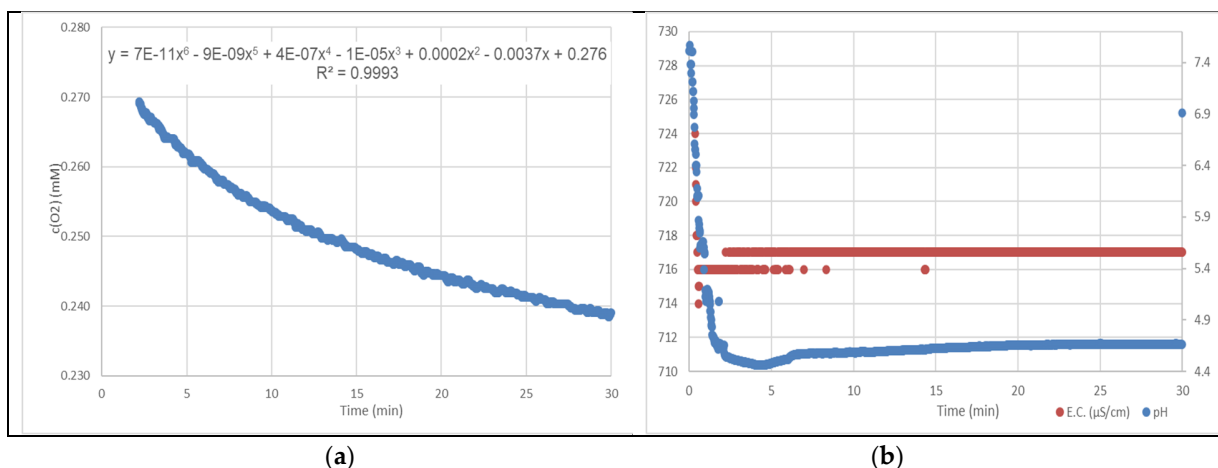

**Figure S11.3.** 0.25 mM  $O_2$  in 150 ml SW with 300 mg GNP. (a) Concentration of  $O_2$  as a function of time with empirical function; (b) E.C. and pH as a function of time, E.C. (left axis), pH (right axis).

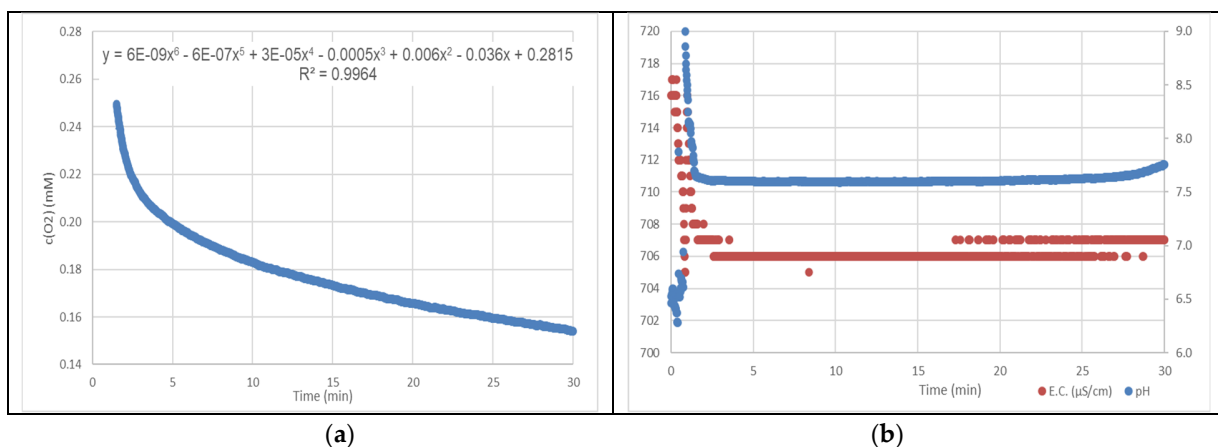

**Figure S11.4.** 0.25 mM  $O_2$  in 150 ml SW with 300 mg GNP reg. (a) Concentration of  $O_2$  as a function of time with empirical function; (b) E.C. and pH as a function of time, E.C. (left axis), pH (right axis).

## S12. Sorption kinetics of vanadium(V), chromium(VI) and manganese(VII) on GNP.

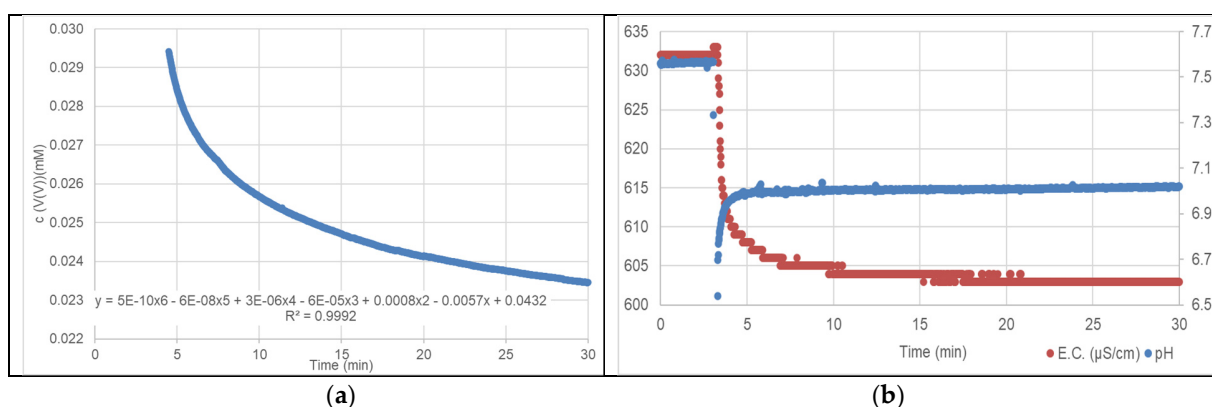

**Figure S12.1** 0.04 mM  $\text{NH}_4\text{VO}_3$  in DW, 500 mg GNP. (a) Concentration of V(V) as a function of time; (b) E.C. and pH as a function of time, E.C. (left axis), pH (right axis).

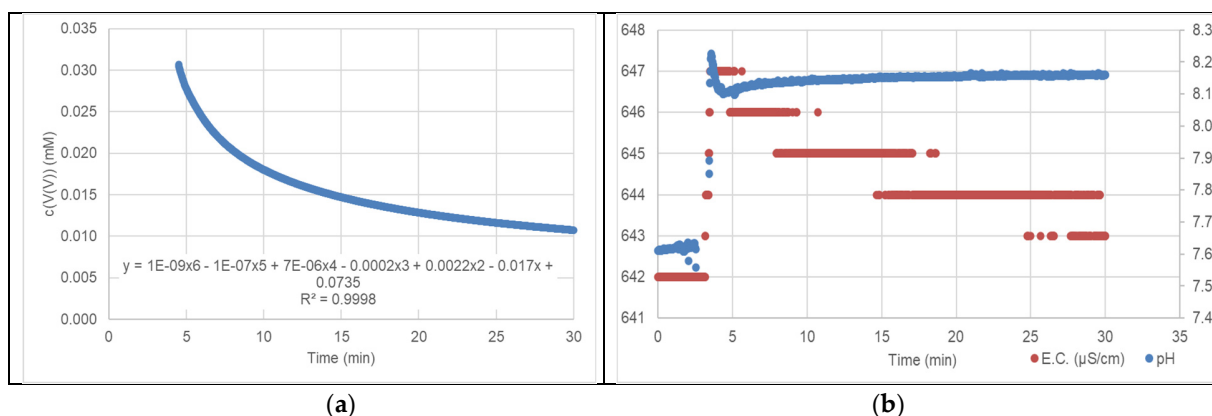

**Figure S12.2** 0.04 mM  $\text{NH}_4\text{VO}_3$  in DW, 500 mg GNP reg. (a) Concentration of V(V) as a function of time; (b) E.C. and pH as a function of time, E.C. (left axis), pH (right axis).

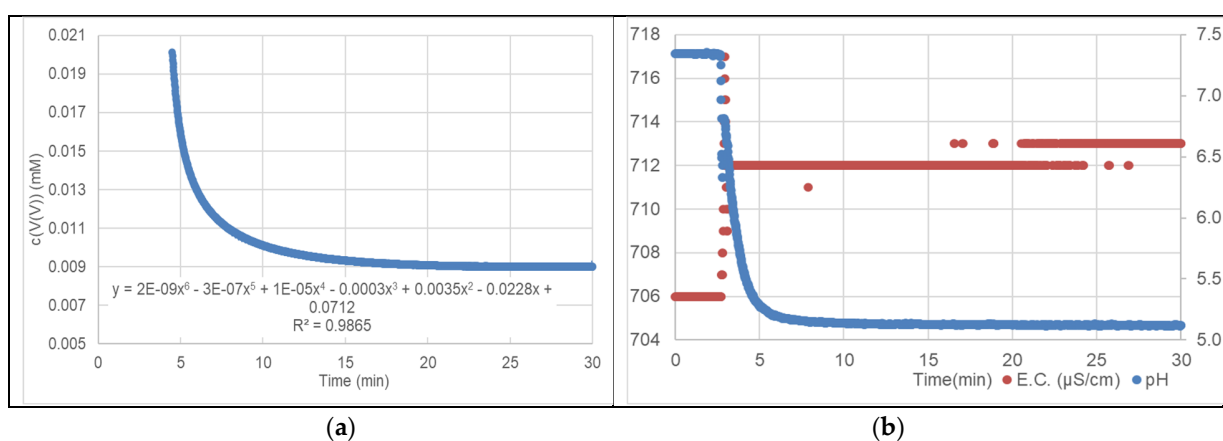

**Figure S12.3** 0.04 mM  $\text{NH}_4\text{VO}_3$  in 5 mM  $\text{NH}_4\text{Cl}$ , 500 mg GNP. (a) Concentration of V(V) as a function of time; (b) E.C. and pH as a function of time, E.C. (left axis), pH (right axis).

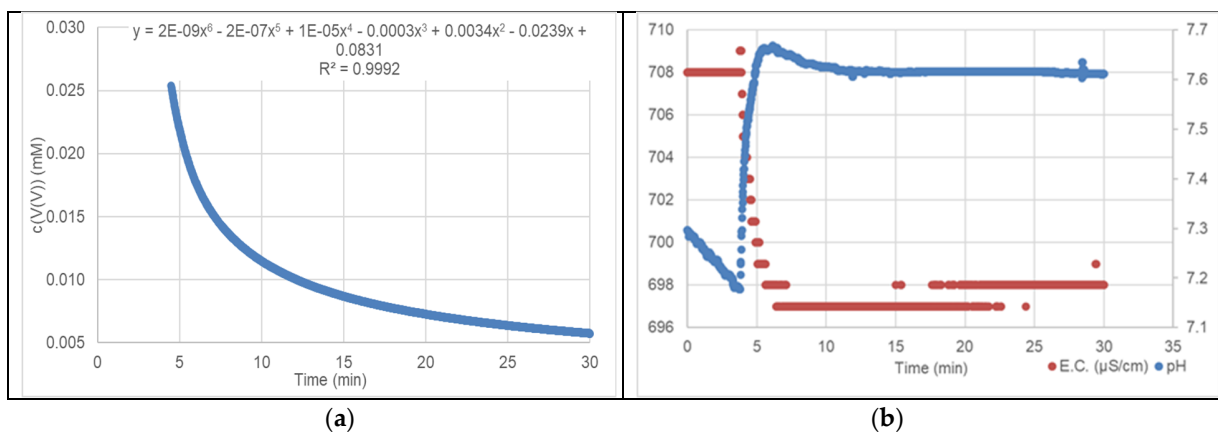

**Figure S12.4.** 0.04 mM  $\text{NH}_4\text{VO}_3$  in 5 mM  $\text{NH}_4\text{Cl}$ , 500 mg GNP reg. (a) Concentration of V(V) as a function of time; (b) E.C. and pH as a function of time, E.C. (left axis), pH (right axis).

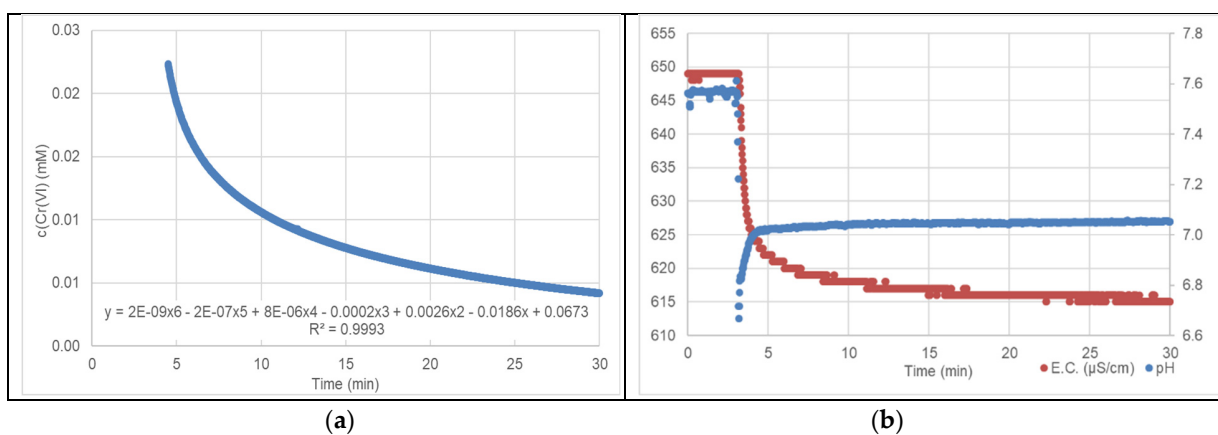

**Figure S12.5.** 0.04 mM  $\text{K}_2\text{CrO}_4$  in DW, 500 mg GNP. (a) Concentration of Cr(VI) as a function of time; (b) E.C. and pH as a function of time, E.C. (left axis), pH (right axis).

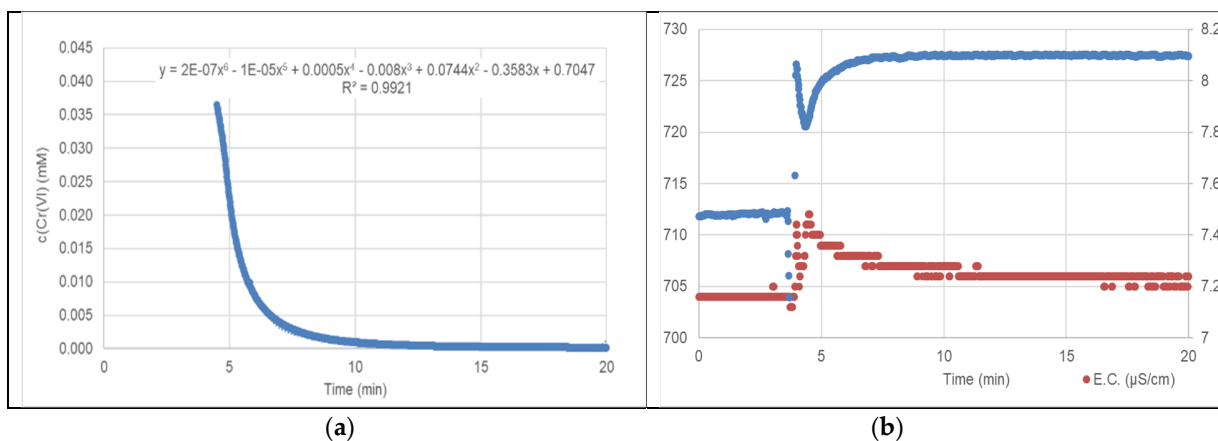

**Figure S12.6.** 0.04 mM  $\text{K}_2\text{CrO}_4$  in DW, 500 mg GNP reg. (a) Concentration of Cr(VI) as a function of time; (b) E.C. and pH as a function of time, E.C. (left axis), pH (right axis).



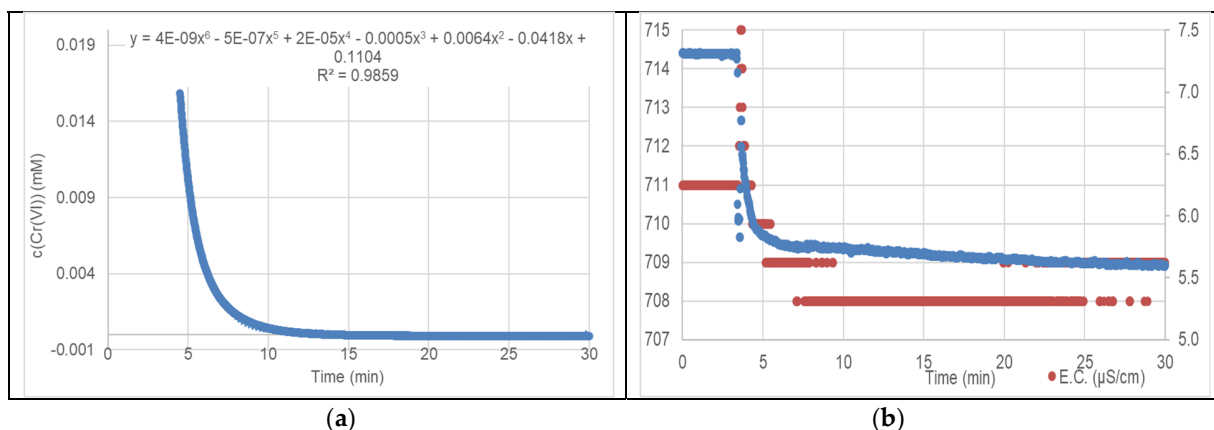

**Figure S12.7.** 0.04 mM  $\text{K}_2\text{CrO}_4$  in 5 mM  $\text{NH}_4\text{Cl}$ , 507 mg GNP. (a) Concentration of Cr(VI) as a function of time; (b) E.C. and pH as a function of time, E.C. (left axis), pH (right axis).

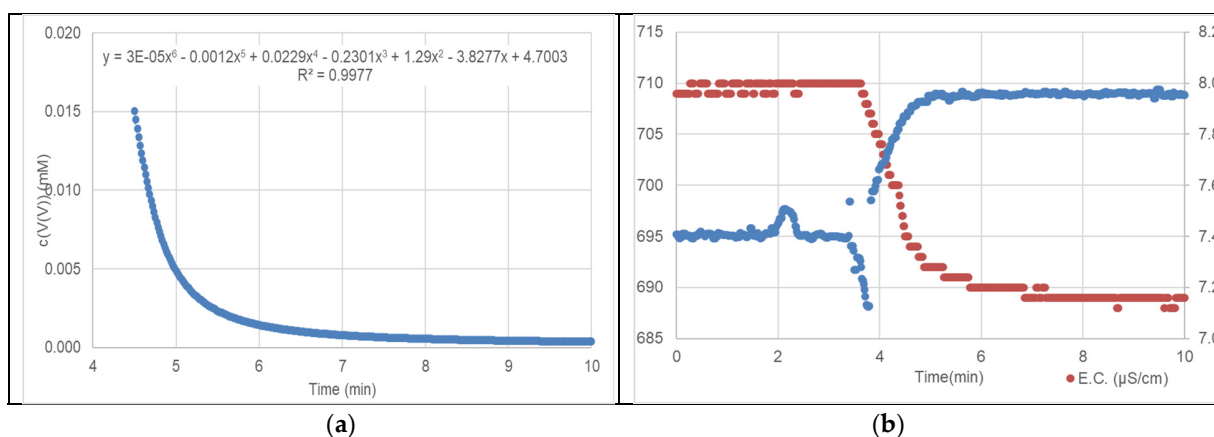

**Figure S12.8.** 0.04 mM  $\text{K}_2\text{CrO}_4$  in 5 mM  $\text{NH}_4\text{Cl}$ , 500 mg GNP reg. (a) Concentration of Cr(VI) as a function of time; (b) E.C. and pH as a function of time, E.C. (left axis), pH (right axis).

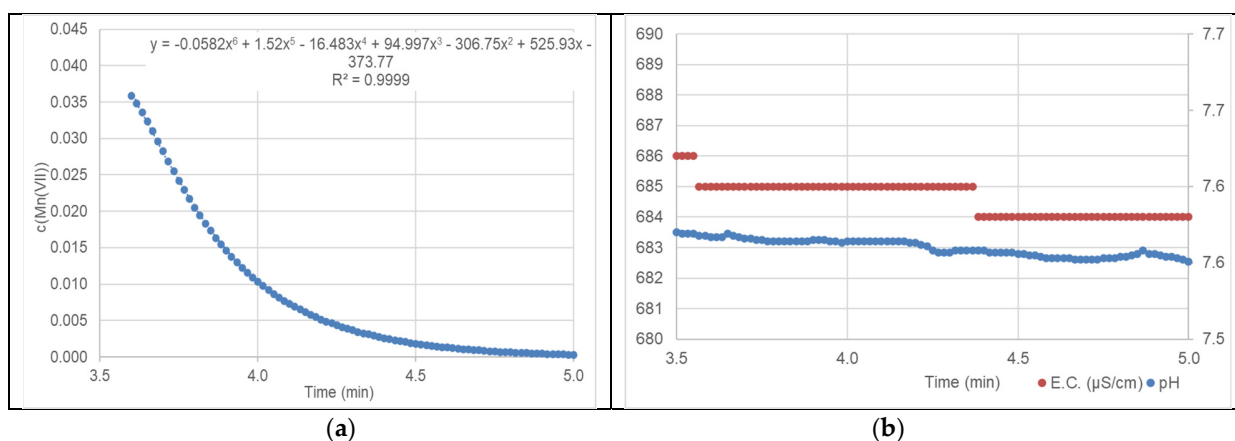

**Figure S12.9.** 0.04 mM  $\text{KMnO}_4$  in DW, 50.0 mg GNP. (a) Concentration of Mn(VII) as a function of time; (b) E.C. and pH as a function of time, E.C. (left axis), pH (right axis).

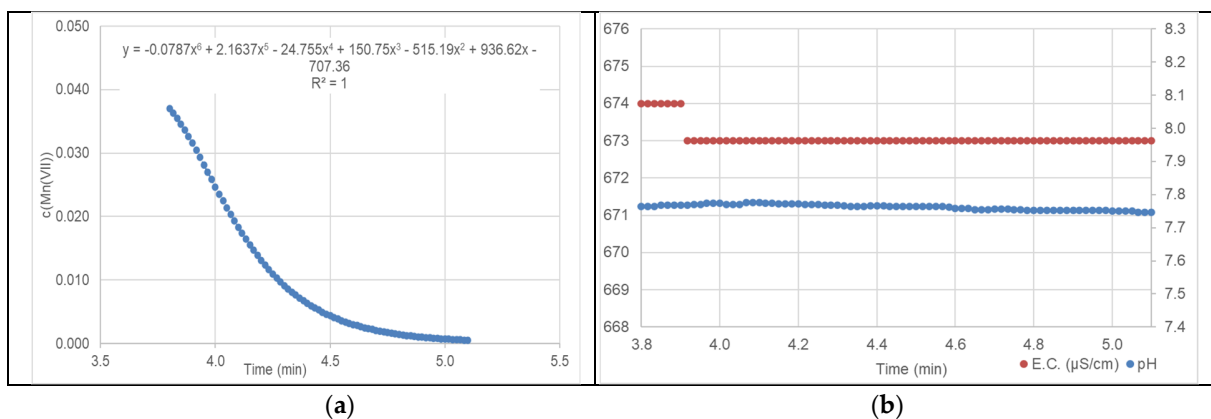

**Figure S12.10.** 0.04 mM  $\text{KMnO}_4$  in DW, 50.0 mg GNP reg. (a) Concentration of Mn(VII) as a function of time; (b) E.C. and pH as a function of time, E.C. (left axis), pH (right axis).

250 ml 3.1 mM  $\text{Na}_2\text{SO}_4$ , 0.04 mM  $\text{KMnO}_4$ , 50.7 mg GNP.

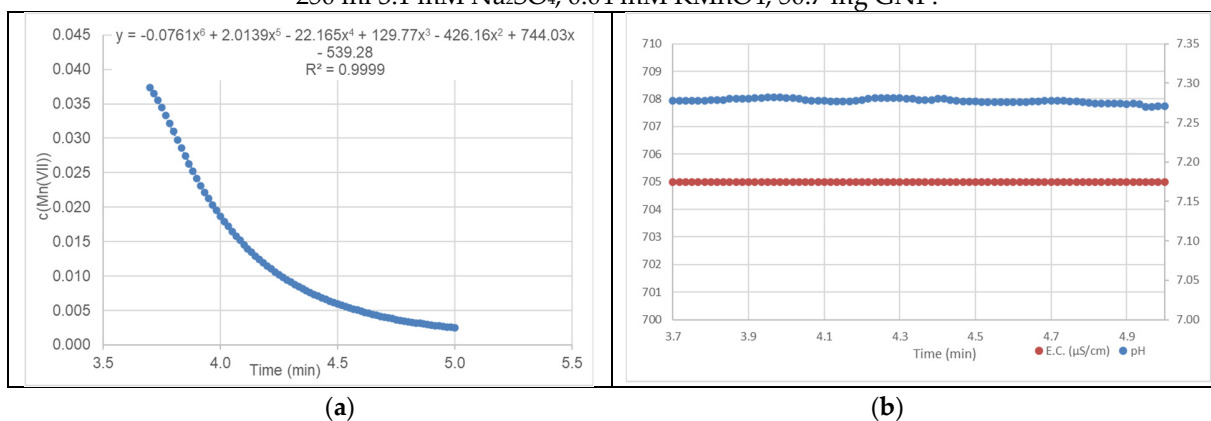

**Figure S12.11.** 0.04 mM  $\text{KMnO}_4$  in 3.1 mM  $\text{Na}_2\text{SO}_4$ , 50.7 mg GNP. (a) Concentration of Mn(VII) as a function of time; (b) E.C. and pH as a function of time, E.C. (left axis), pH (right axis).

250 ml 3.1 mM  $\text{Na}_2\text{SO}_4$ , 0.04 mM  $\text{KMnO}_4$ , 50.9 mg GNP reg.

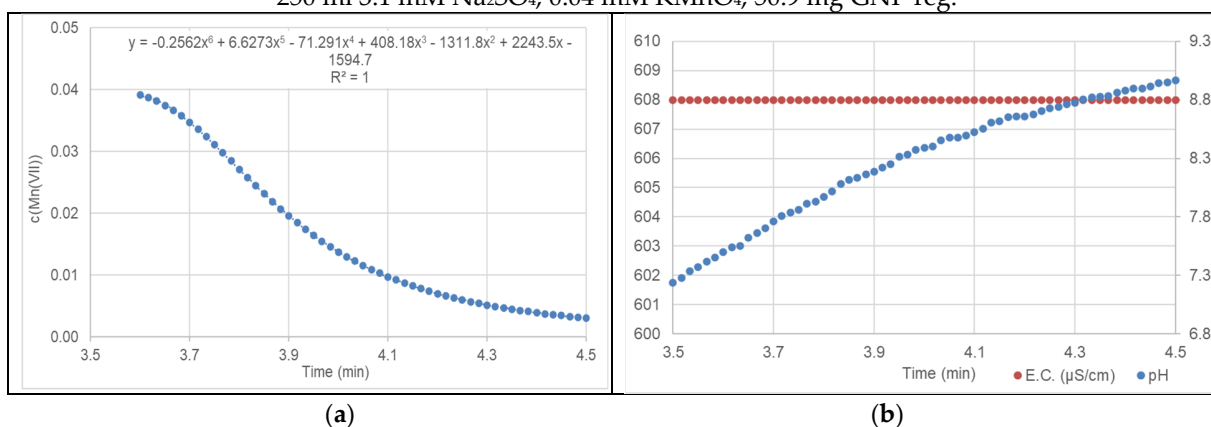

**Figure S12.12.** 0.04 mM  $\text{KMnO}_4$  in 3.1 mM  $\text{Na}_2\text{SO}_4$ , 50.9 mg GNP reg. (a) Concentration of Mn(VII) as a function of time; (b) E.C. and pH as a function of time, E.C. (left axis), pH (right axis).

**S13. Residual metal concentrations in water after sorption.**

| Process                                                                          | Concentration after<br>30 min (mM), UV-vis | Concentration<br>(mM), ICP-MS |
|----------------------------------------------------------------------------------|--------------------------------------------|-------------------------------|
| 0.04 mM $\text{NH}_4\text{VO}_3$ in 5 mM $\text{NH}_4\text{Cl}$ , 500 mg GNP reg | 0.0057                                     | 0.0057                        |
| 0.04 mM $\text{K}_2\text{CrO}_4$ in DW, 500 mg GNP reg                           | <0.003                                     | 0.0008                        |
| 0.04 mM $\text{K}_2\text{CrO}_4$ in 5 mM $\text{NH}_4\text{Cl}$ , 500 mg GNP reg | 0.0033                                     | 0.0037                        |
| 0.04 mM $\text{K}_2\text{CrO}_4$ in DW, 500 mg GNP                               | 0.0010                                     | 0.0009                        |
| 0.04 mM $\text{KMnO}_4$ in DW, 50.0 mg GNP                                       | <0.003                                     | 0.0040                        |
| 0.04 mM $\text{KMnO}_4$ in DW, 50.0 mg GNP reg                                   | <0.003                                     | 0.0020                        |

**S14. Process conditions of evaluated kinetic data.**

| Process                                                                               | Evaluation time (min) | T <sub>m</sub> (°C) | pH start | ΔpH <sup>1</sup> | Δ E.C. (μS/cm) <sup>1</sup> |
|---------------------------------------------------------------------------------------|-----------------------|---------------------|----------|------------------|-----------------------------|
| 0.04 mM NH <sub>4</sub> VO <sub>3</sub> in DW, 500 mg GNP                             | 5.8 - 16.5            | 25.4 ± 0.5          | 7.00     | 0.01             | -4                          |
| 0.04 mM NH <sub>4</sub> VO <sub>3</sub> in DW, 500 mg GNP reg.                        | 8.5 - 17.5            | 24.1 ± 0.1          | 8.14     | 0.02             | -2                          |
| 0.04 mM NH <sub>4</sub> VO <sub>3</sub> in 5 mM NH <sub>4</sub> Cl, 500 mg GNP        | 9.1 - 12.8            | 25.0 ± 0.1          | 5.14     | -0.01            | 0                           |
| 0.04 mM NH <sub>4</sub> VO <sub>3</sub> in 5 mM NH <sub>4</sub> Cl, 500 mg GNP reg    | 7.4 - 11.5            | 25.2 ± 0.1          | 7.65     | -0.03            | 0                           |
| 0.04 mM K <sub>2</sub> CrO <sub>4</sub> in DW, 500 mg GNP                             | 8.0 - 23.0            | 24.8 ± 0.1          | 7.03     | 0.01             | -3                          |
| 0.04 mM K <sub>2</sub> CrO <sub>4</sub> in DW, 500 mg GNP reg.                        | 9.4 - 18.0            | 23.9 ± 0.1          | 8.10     | 0.00             | -1                          |
| 0.04 mM K <sub>2</sub> CrO <sub>4</sub> in 5 mM NH <sub>4</sub> Cl, 507 mg GNP        | 4.9 - 5.8             | 25.2 ± 0.1          | 5.85     | -0.05            | -1                          |
| 0.04 mM K <sub>2</sub> CrO <sub>4</sub> in 5 mM NH <sub>4</sub> Cl, 500 mg GNP reg    | 5.1 - 5.7             | 24.3 ± 0.1          | 7.96     | 0.01             | -1                          |
| 0.04 mM KMnO <sub>4</sub> in DW, 50.0 mg GNP                                          | 5.1 - 5.7             | 24.1 ± 0.1          | 7.56     | -0.01            | -1                          |
| 0.04 mM KMnO <sub>4</sub> in DW, 50.0 mg GNP reg.                                     | 4.1 - 5.0             | 24.0 ± 0.1          | 7.78     | -0.02            | 0                           |
| 0.04 mM KMnO <sub>4</sub> in 3.1 mM Na <sub>2</sub> SO <sub>4</sub> , 50.7 mg GNP     | 3.8 - 4.8             | 25.0 ± 0.1          | 7.28     | 0.00             | 0                           |
| 0.04 mM KMnO <sub>4</sub> in 3.1 mM Na <sub>2</sub> SO <sub>4</sub> , 50.9 mg GNP reg | 3.7 - 4.4             | 24.1 ± 0.2          | 7.76     | 1.12             | 0                           |

<sup>1</sup> Difference between end and start values.

**S15. Error estimation due to pH value variation in kinetic evaluations.**

| Process                                                                                                         | pH<br>start                      | $\Delta$ pH | $\Delta$ c<br>(mM) | Error<br>(%) | pH<br>start                                    | $\Delta$ pH | $\Delta$ c (mM) | Error<br>(%) |
|-----------------------------------------------------------------------------------------------------------------|----------------------------------|-------------|--------------------|--------------|------------------------------------------------|-------------|-----------------|--------------|
|                                                                                                                 | 1 <sup>st</sup> order evaluation |             |                    |              | PSO / 2 <sup>nd</sup> order kinetic evaluation |             |                 |              |
| 0.04 mM NH <sub>4</sub> VO <sub>3</sub> in DW, 500 mg GNP                                                       |                                  |             |                    |              | 7.00                                           | <0.01       | <0.00001        | <0.001       |
| 0.04 mM NH <sub>4</sub> VO <sub>3</sub> in DW, 500 mg GNP reg                                                   |                                  |             |                    |              | 8.14                                           | <0.01       | <0.00001        | <0.001       |
| 0.04 mM NH <sub>4</sub> VO <sub>3</sub> in 5 mM NH <sub>4</sub> Cl, 500 mg GNP                                  |                                  |             |                    |              | 5.14                                           | -0.01       | 0.0002          | 0.003        |
| 0.04 mM NH <sub>4</sub> VO <sub>3</sub> in 5 mM NH <sub>4</sub> Cl, 500 mg GNP reg                              |                                  |             |                    |              | 7.65                                           | -0.03       | 0.00            | 0.007        |
| 0.04 mM K <sub>2</sub> CrO <sub>4</sub> in DW, 500 mg GNP                                                       |                                  |             |                    |              | 7.03                                           | 0.01        | 0.0001          | 0.002        |
| 0.04 mM K <sub>2</sub> CrO <sub>4</sub> in DW, 500 mg GNP reg                                                   |                                  |             |                    |              | 8.10                                           | <0.01       | <0.00001        | <0.001       |
| 0.04 mM K <sub>2</sub> CrO <sub>4</sub> in 5 mM NH <sub>4</sub> Cl, 507 mg GNP                                  |                                  |             |                    |              | 5.85                                           | <0.01       | <0.00001        | <0.001       |
| 0.04 mM K <sub>2</sub> CrO <sub>4</sub> in 5 mM NH <sub>4</sub> Cl, 500 mg GNP reg                              |                                  |             |                    |              | 7.96                                           | <0.01       | <0.00001        | <0.001       |
| 0.04 mM KMnO <sub>4</sub> in DW, 50.0 mg GNP                                                                    | 7.56                             | -0.01       | <0.00001           | <0.001       |                                                |             |                 |              |
| 0.04 mM KMnO <sub>4</sub> in DW, 50.0 mg GNP reg                                                                | 7.78                             | -0.02       | <0.00001           | <0.001       |                                                |             |                 |              |
| 0.04 mM KMnO <sub>4</sub> in 3.1 mM Na <sub>2</sub> SO <sub>4</sub> , 50.7 mg GNP                               | 7.28                             | <0.01       | <0.00001           | <0.001       |                                                |             |                 |              |
| 0.04 mM KMnO <sub>4</sub> in 3.1 mM Na <sub>2</sub> SO <sub>4</sub> , 50.9 mg GNP reg                           | 7.76                             | 1.21        | <0.00001           | <0.001       |                                                |             |                 |              |
| Note: Error (%) = 100 * (C <sub>end</sub> - C <sub>start</sub> ) / 0.5 (C <sub>end</sub> + C <sub>start</sub> ) |                                  |             |                    |              |                                                |             |                 |              |

**S16. Sorption kinetics of vanadium(V), chromium(VI) and manganese(VII) in DW with mass variation of GNP.**

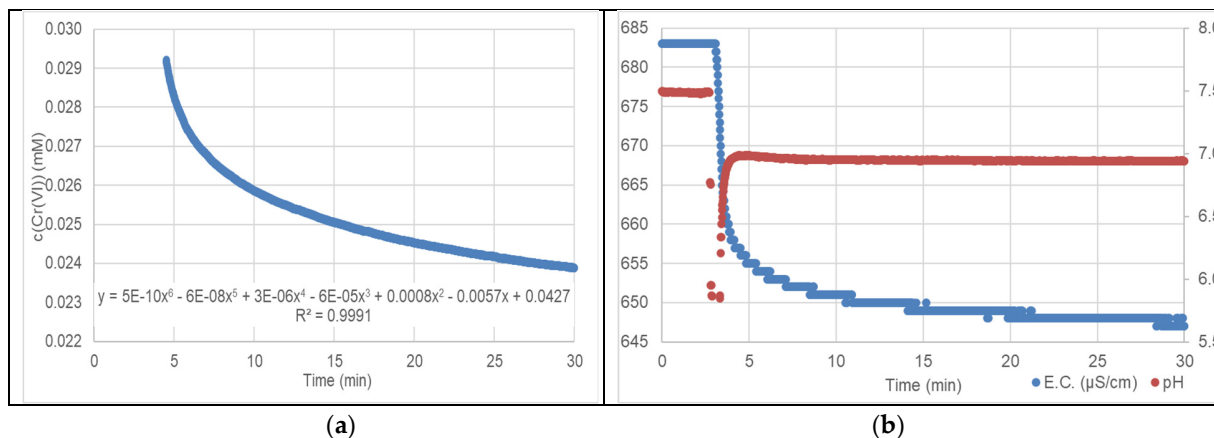

**Figure S16.1** 250 ml DW with 0.04 mM  $NH_4VO_3$ , 500 mg GNP. (a) Concentration of V(V) as a function of time; (b) E.C. and pH as a function of time, E.C. (left axis), pH (right axis).

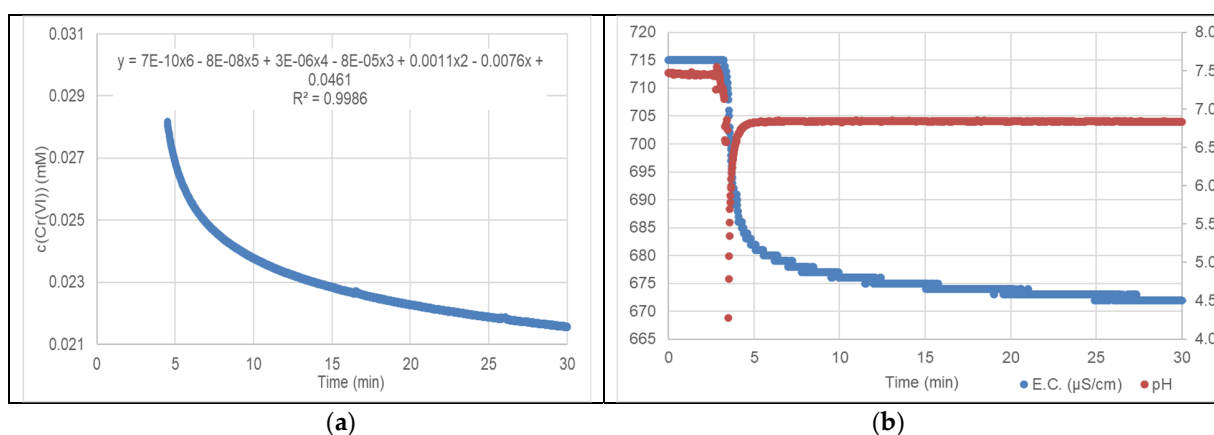

**Figure S16.2** 250 ml DW with 0.04 mM  $NH_4VO_3$ , 625 mg GNP. (a) Concentration of V(V) as a function of time; (b) E.C. and pH as a function of time, E.C. (left axis), pH (right axis).

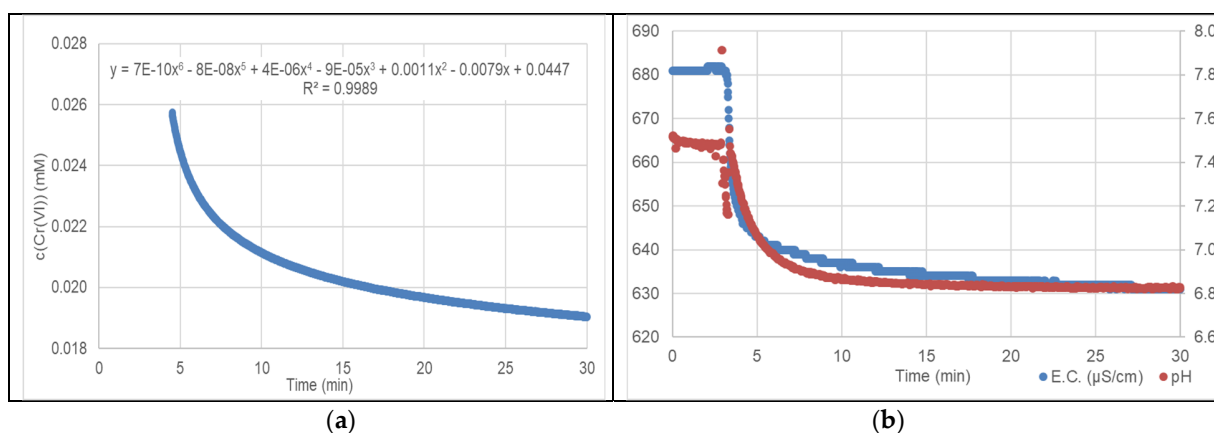

**Figure S16.3** 250 ml DW with 0.04 mM  $NH_4VO_3$ , 750 mg GNP. (a) Concentration of V(V) as a function of time; (b) E.C. and pH as a function of time, E.C. (left axis), pH (right axis).

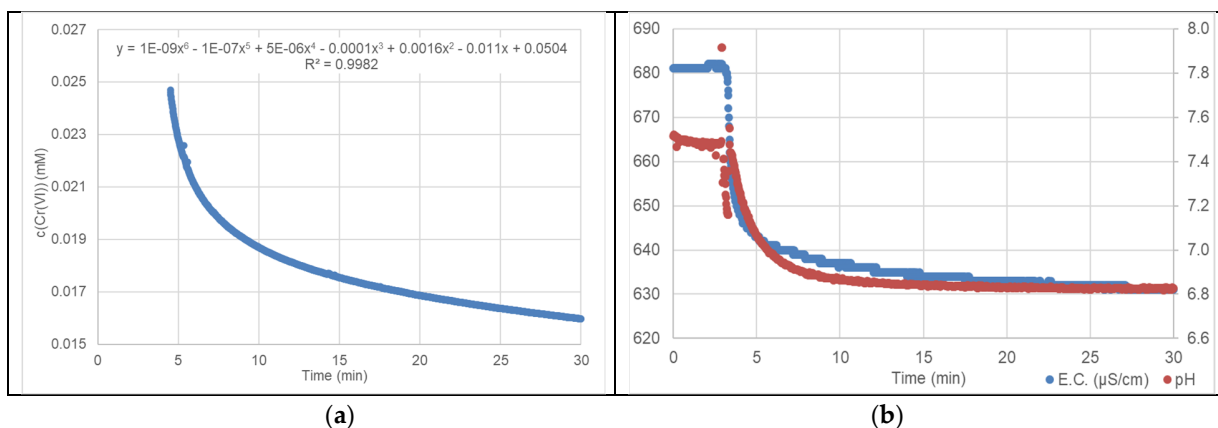

**Figure S16.4** 250 ml DW with 0.04 mM  $\text{NH}_4\text{VO}_3$ , 875 mg GNP. (a) Concentration of V(V) as a function of time; (b) E.C. and pH as a function of time, E.C. (left axis), pH (right axis).

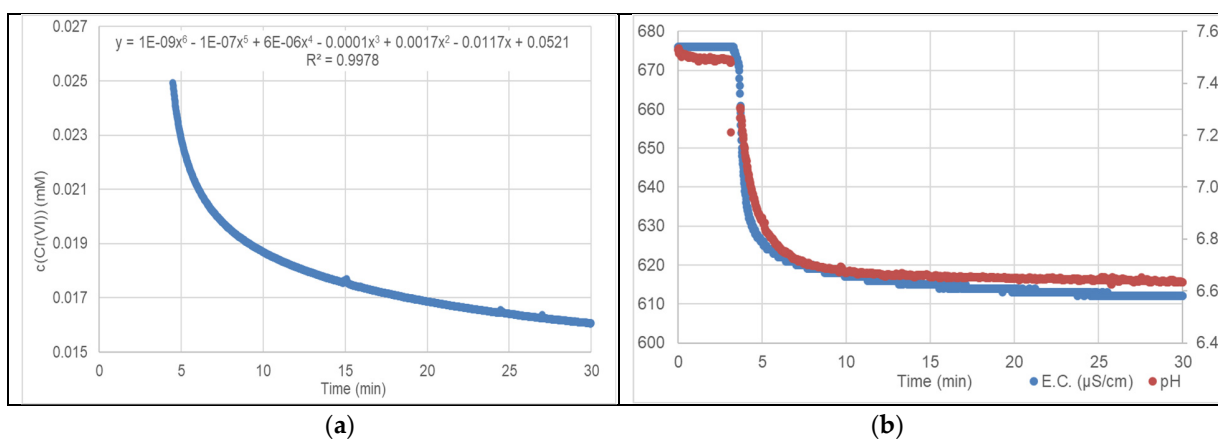

**Figure S16.5** 250 ml DW with 0.04 mM  $\text{NH}_4\text{VO}_3$ , 1000 mg GNP. (a) Concentration of V(V) as a function of time; (b) E.C. and pH as a function of time, E.C. (left axis), pH (right axis).

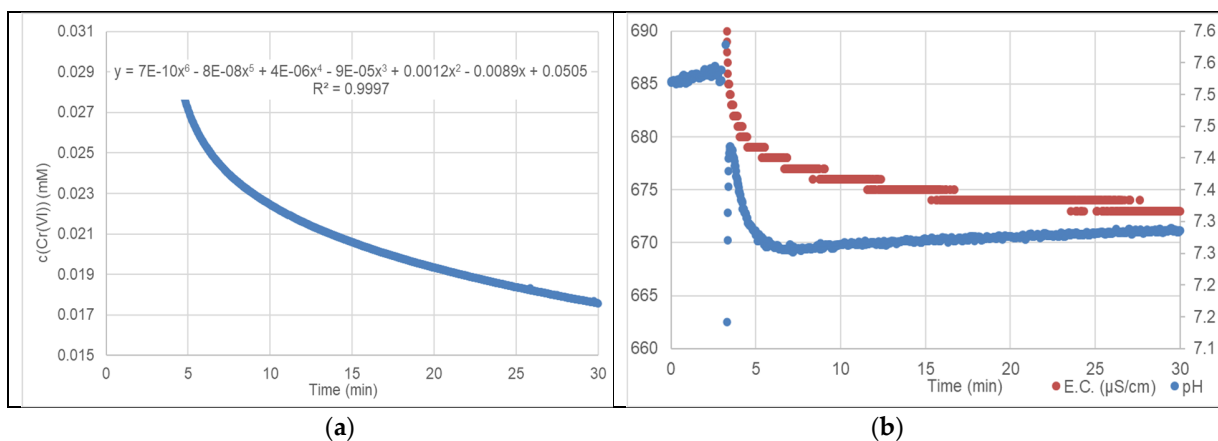

**Figure S16.6.** 250 ml DW with 0.04 mM  $\text{K}_2\text{CrO}_4$ , 250 mg GNP. (a) Concentration of Cr(VI) as a function of time; (b) E.C. and pH as a function of time, E.C. (left axis), pH (right axis).

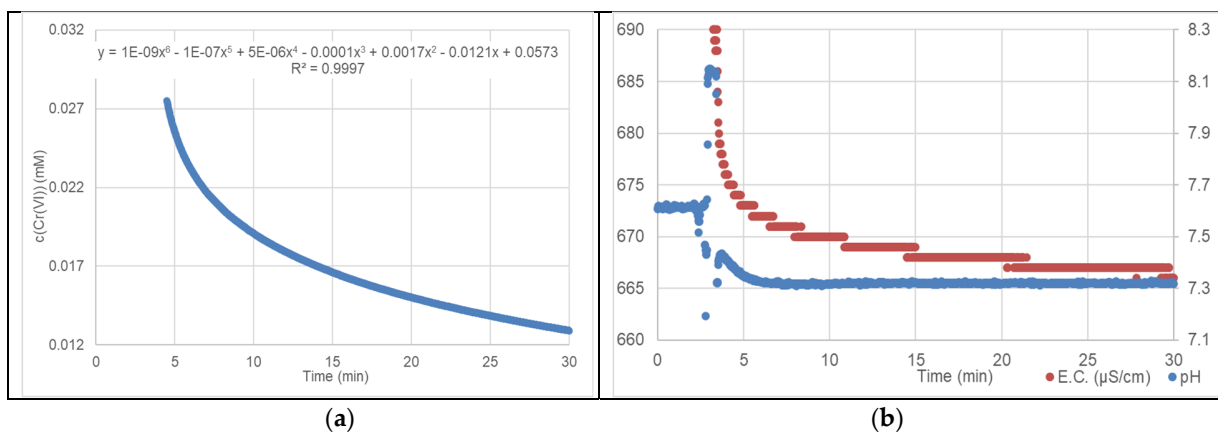

**Figure S16.7.** 250 ml DW with 0.04 mM  $K_2CrO_4$ , 325 mg GNP. (a) Concentration of Cr(VI) as a function of time; (b) E.C. and pH as a function of time, E.C. (left axis), pH (right axis).

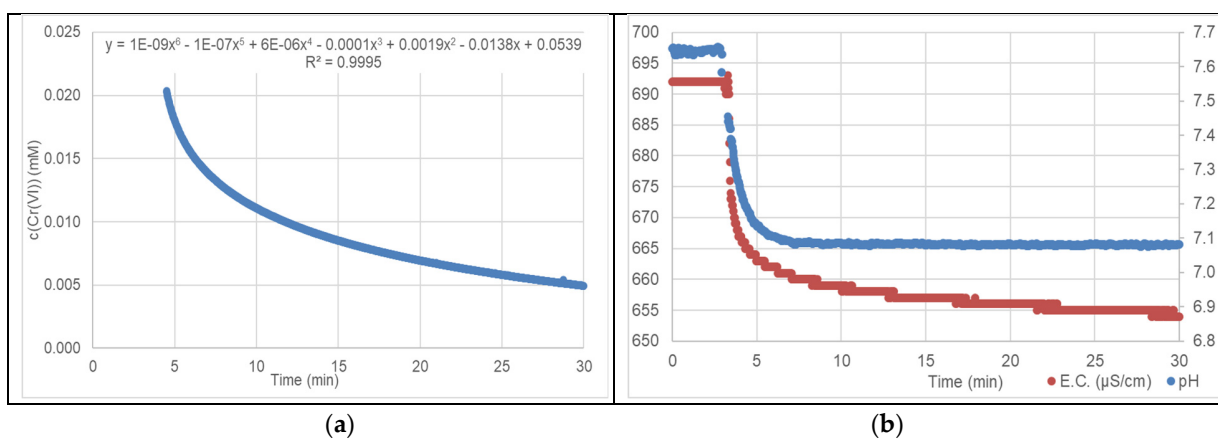

**Figure S16.8.** 250 ml DW with 0.04 mM  $K_2CrO_4$ , 500 mg GNP. (a) Concentration of Cr(VI) as a function of time; (b) E.C. and pH as a function of time, E.C. (left axis), pH (right axis).

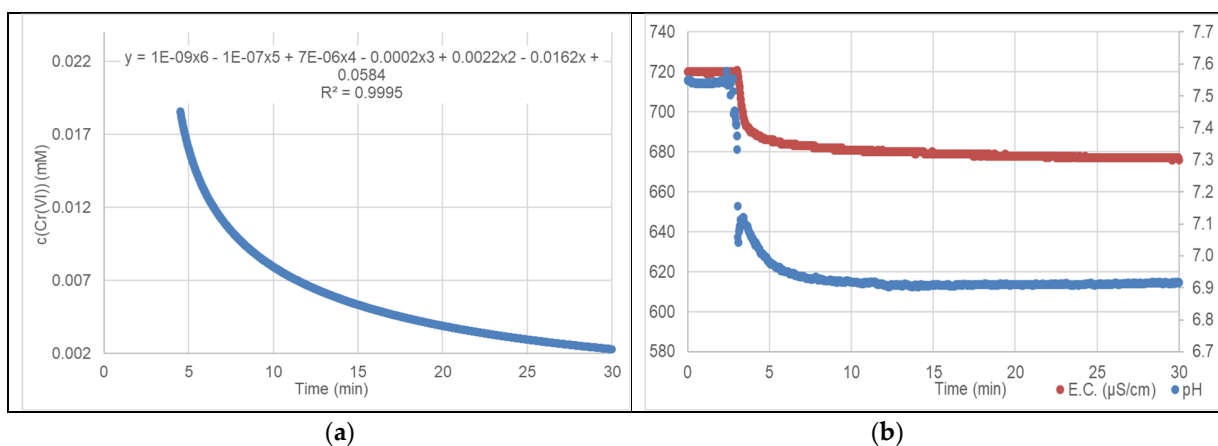

**Figure S16.9.** 250 ml DW with 0.04 mM  $K_2CrO_4$ , 625 mg GNP. (a) Concentration of Cr(VI) as a function of time; (b) E.C. and pH as a function of time, E.C. (left axis), pH (right axis).



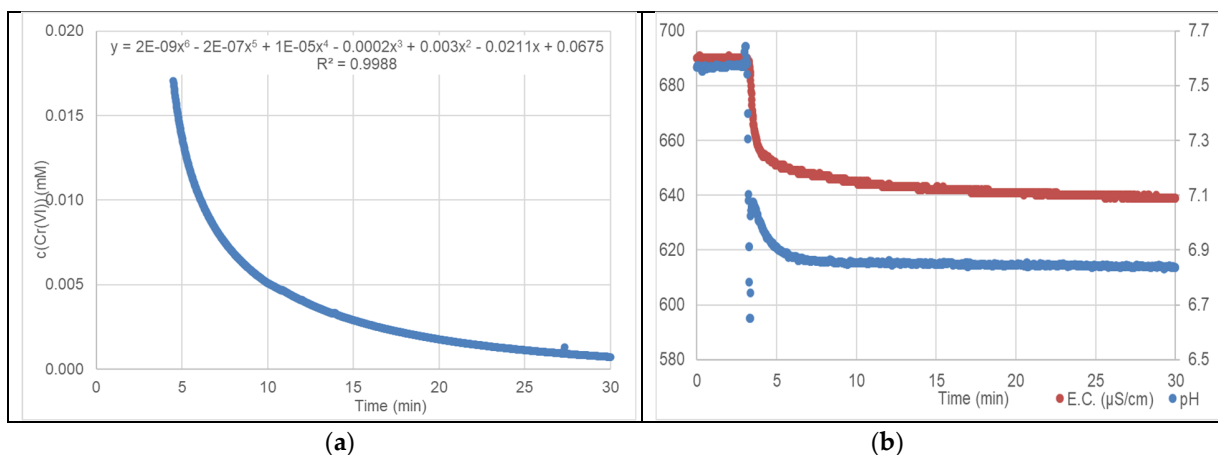

**Figure S16.10.** 250 ml DW with 0.04 mM  $K_2CrO_4$ , 750 mg GNP. (a) Concentration of Cr(VI) as a function of time; (b) E.C. and pH as a function of time, E.C. (left axis), pH (right axis).

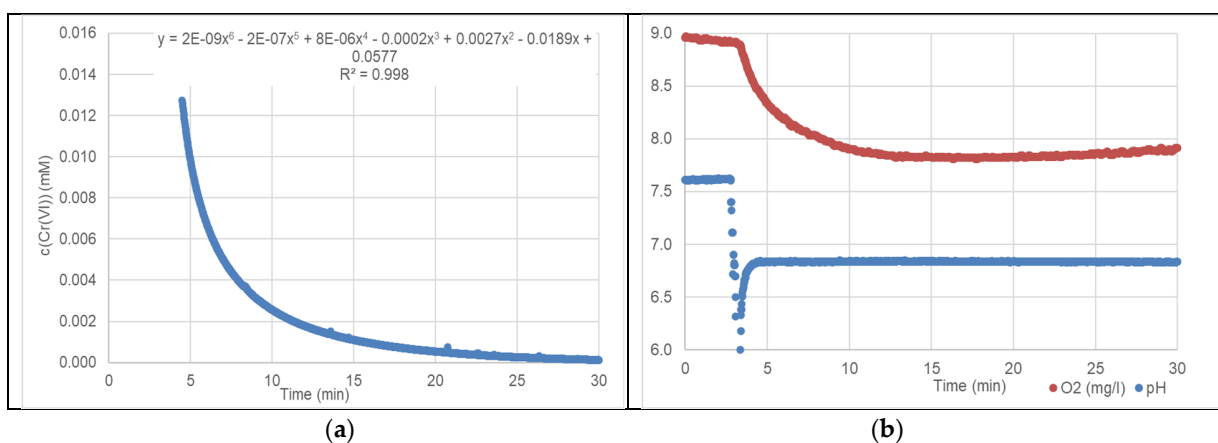

**Figure S16.11.** 250 ml DW with 0.04 mM  $K_2CrO_4$ , 875 mg GNP. (a) Concentration of Cr(VI) as a function of time; (b) E.C. and pH as a function of time, E.C. (left axis), pH (right axis).

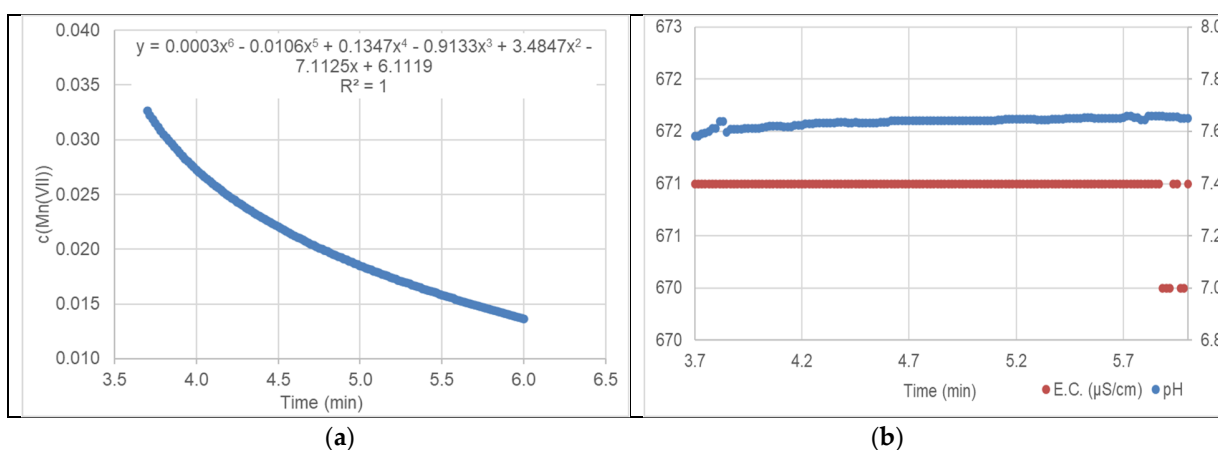

**Figure S16.12.** 250 ml DW with 0.04 mM  $KMnO_4$ , 10 mg GNP. (a) Concentration of Mn(VII) as a function of time; (b) E.C. and pH as a function of time, E.C. (left axis), pH (right axis).

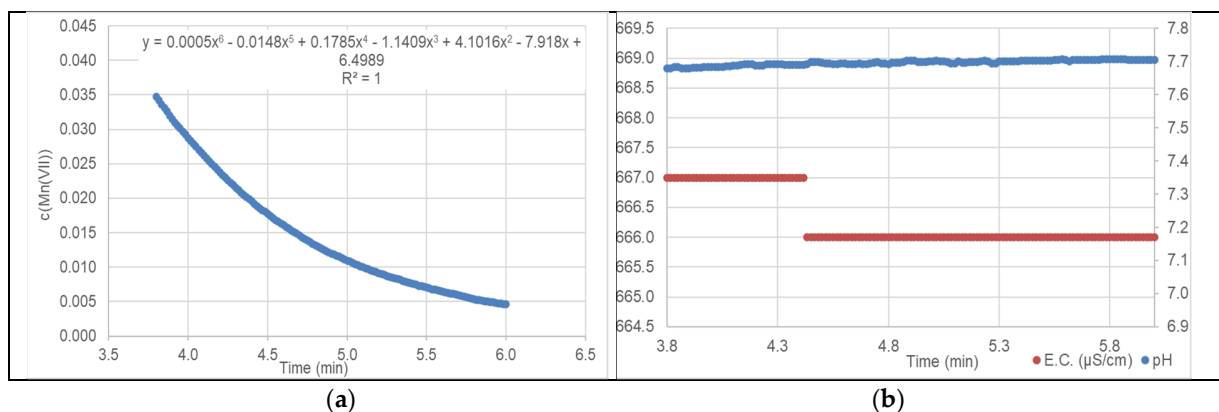

**Figure S16.13.** 250 ml DW with 0.04 mM KMnO<sub>4</sub>, 20 mg GNP. (a) Concentration of Mn(VII) as a function of time; (b) E.C. and pH as a function of time, E.C. (left axis), pH (right axis).

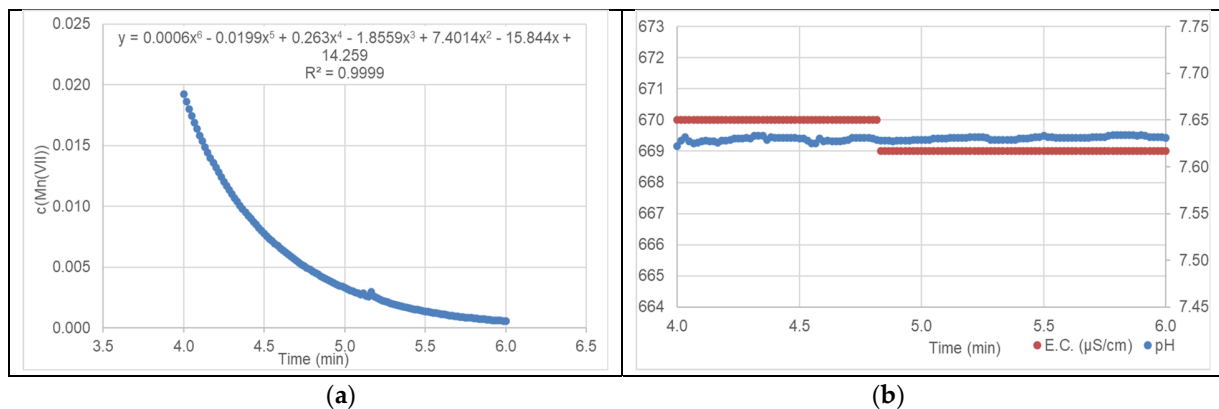

**Figure S16.14.** 250 ml DW with 0.04 mM KMnO<sub>4</sub>, 30 mg GNP. (a) Concentration of Mn(VII) as a function of time; (b) E.C. and pH as a function of time, E.C. (left axis), pH (right axis).

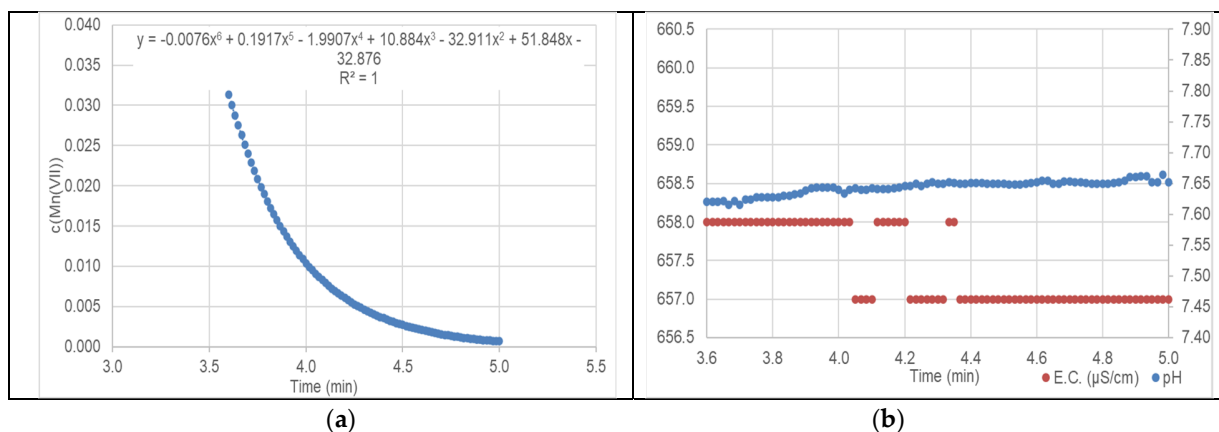

**Figure S16.15.** 250 ml DW with 0.04 mM KMnO<sub>4</sub>, 40 mg GNP. (a) Concentration of Mn(VII) as a function of time; (b) E.C. and pH as a function of time, E.C. (left axis), pH (right axis).

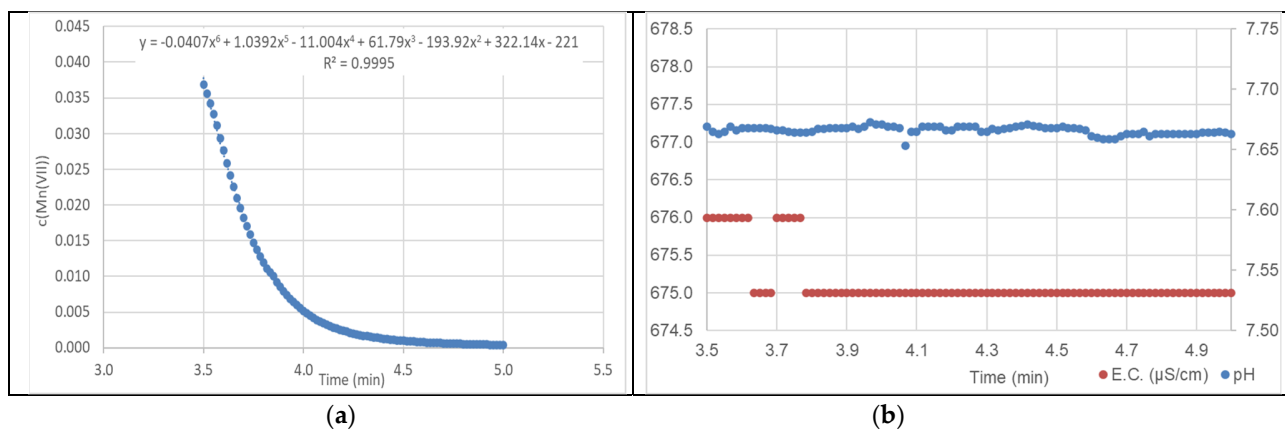

**Figure S16.16.** 250 ml DW with 0.04 mM  $\text{KMnO}_4$ , 50 mg GNP. (a) Concentration of Mn(VII) as a function of time; (b) E.C. and pH as a function of time, E.C. (left axis), pH (right axis).

# S17. Evaluation of the influence of GNP mass on oxometalate sorption kinetics.

**Table S17.1.** PSO adsorption kinetic evaluation of 0.04 mM vanadium(V) in DW with different GNP mass.<sup>1</sup>

| Sorption                                                      | T <sub>m</sub><br>(°C) | k <sub>PSO</sub> (mM <sup>-1</sup><br>min <sup>-1</sup> ) | q <sub>e</sub> (mM L <sup>-1</sup> ),<br>calculated | q <sub>e</sub> (mM L <sup>-1</sup> ),<br>exp. <sup>1</sup> | R <sup>2</sup> adj | pH<br>start | ΔpH   | ΔE.C.<br>(μS/cm) |
|---------------------------------------------------------------|------------------------|-----------------------------------------------------------|-----------------------------------------------------|------------------------------------------------------------|--------------------|-------------|-------|------------------|
| 0.04 mM NH <sub>4</sub> VO <sub>3</sub> in<br>DW, 500 mg GNP  | 25.9 ±<br>0.2          | 30.5 ± 0.5                                                | 0.0169 ±<br>0.0001                                  | 0.00881 ±<br>0.0003                                        | 0.9857             | 6.96        | -0.02 | -4               |
| 0.04 mM NH <sub>4</sub> VO <sub>3</sub> in<br>DW, 625 mg GNP  | 24.8 ±<br>0.1          | 25.4 ± 0.4                                                | 0.0195 ±<br>0.0001                                  | 0.00448 ±<br>0.0001                                        | 0.9881             | 6.84        | 0.00  | -4               |
| 0.04 mM NH <sub>4</sub> VO <sub>3</sub> in<br>DW, 750 mg GNP  | 22.9 ±<br>0.2          | 25.8 ± 0.6                                                | 0.0221 ±<br>0.0001                                  | 0.00430 ±<br>0.0001                                        | 0.9737             | 6.93        | -0.09 | -7               |
| 0.04 mM NH <sub>4</sub> VO <sub>3</sub> in<br>DW, 875 mg GNP  | 22.9 ±<br>0.2          | 20.8 ± 0.5                                                | 0.0253 ±<br>0.0001                                  | 0.00267 ±<br>0.0001                                        | 0.9725             | 6.93        | -0.09 | -7               |
| 0.04 mM NH <sub>4</sub> VO <sub>3</sub> in<br>DW, 1000 mg GNP | 25.6 ±<br>0.1          | 20.9 ± 0.5                                                | 0.025 ±<br>0.0001                                   | 0.00207 ±<br>0.0001                                        | 0.9752             | 6.72        | -0.07 | -7               |

<sup>1</sup> Data for regression: 31, evaluation time: 7.0 – 18.0; <sup>2</sup> ICP/MS values at equilibrium.

**Table S17.2.** Pseudo-second-order kinetic evaluation of 0.04 mM chromium(VI) in DW with different GNP mass.

| Sorption                                                     | Data for<br>regression | T <sub>m</sub> (°C) | Evaluation<br>time (min) | k <sub>2</sub> (mM <sup>-1</sup><br>*min <sup>-1</sup> ) | R <sup>2</sup> adj | pH<br>start | ΔpH   | ΔE.C.<br>(μS/cm) |
|--------------------------------------------------------------|------------------------|---------------------|--------------------------|----------------------------------------------------------|--------------------|-------------|-------|------------------|
| 0.04 mM K <sub>2</sub> CrO <sub>4</sub> in<br>DW, 250 mg GNP | 19                     | 24.2 ±<br>0.1       | 7.0 - 9.0                | 1.25 ± 0.10                                              | 0.9466             | 7.26        | 0.00  | 0                |
| 0.04 mM K <sub>2</sub> CrO <sub>4</sub> in<br>DW, 325 mg GNP | 20                     | 22.9 ±<br>0.1       | 6.9 - 9.4                | 2.20 ± 0.14                                              | 0.9616             | 7.32        | 0.00  | -1               |
| 0.04 mM K <sub>2</sub> CrO <sub>4</sub> in<br>DW, 500 mg GNP | 20                     | 24.9 ±<br>0.1       | 6.7 - 9.0                | 6.35 ± 0.24                                              | 0.9867             | 7.09        | 0.00  | -2               |
| 0.04 mM K <sub>2</sub> CrO <sub>4</sub> in<br>DW, 625 mg GNP | 24                     | 24.5 ±<br>0.1       | 6.7 - 9.0                | 12.1 ± 0.2                                               | 0.9976             | 6.94        | -0.02 | -2               |
| 0.04 mM K <sub>2</sub> CrO <sub>4</sub> in<br>DW, 750 mg GNP | 21                     | 24.8 ±<br>0.1       | 5.0 - 9.0                | 24.1 ± 0.3                                               | 0.9982             | 6.91        | -0.05 | -5               |
| 0.04 mM K <sub>2</sub> CrO <sub>4</sub> in<br>DW, 875 mg GNP | 30                     | 24.3 ±<br>0.1       | 4.0 - 7.0                | 48.2 ± 1.0                                               | 0.9905             | 6.80        | 0.04  | -                |

**Table S17.3.** Pseudo-first-order kinetic evaluation of 0.04 mM manganese(VII) in DW with different GNP mass.

| Process                                       | Data for<br>regression | T <sub>m</sub><br>(°C) | Evaluation<br>time (min) | k <sub>1</sub><br>(min <sup>-1</sup> ) | R <sup>2</sup> adj | pH<br>start | ΔpH  | ΔE.C.<br>(μS/cm) |
|-----------------------------------------------|------------------------|------------------------|--------------------------|----------------------------------------|--------------------|-------------|------|------------------|
| 0.04 mM KMnO <sub>4</sub> in<br>DW, 10 mg GNP | 27                     | 25.1<br>± 0.1          | 4.2 - 5.9                | 0.333 ±<br>0.022                       | 0.9230             | 7.62        | 0.03 | -1               |
| 0.04 mM KMnO <sub>4</sub> in<br>DW, 20 mg GNP | 25                     | 25.7<br>± 0.1          | 4.2 - 5.9                | 0.924 ±<br>0.031                       | 0.9830             | 7.69        | 0.02 | -1               |
| 0.04 mM KMnO <sub>4</sub> in<br>DW, 30 mg GNP | 25                     | 25.1<br>± 0.1          | 4.2 - 5.9                | 1.74 ±<br>0.02                         | 0.9985             | 7.63        | 0.01 | -1               |

|                                            |    |            |           |             |        |      |      |    |
|--------------------------------------------|----|------------|-----------|-------------|--------|------|------|----|
| 0.04 mM KMnO <sub>4</sub> in DW, 40 mg GNP | 21 | 25.0 ± 0.1 | 3.6 - 4.6 | 2.72 ± 0.03 | 0.9988 | 7.62 | 0.03 | -1 |
| 0.04 mM KMnO <sub>4</sub> in DW, 50 mg GNP | 19 | 25.3 ± 0.1 | 3.5 - 4.4 | 3.92 ± 0.02 | 0.9631 | 7.67 | 0.00 | -1 |

**Table S17.4.** Error estimation for plotting log  $k_{PSO}$  of V(V) versus surface area of GNP. <sup>1</sup>

| GNP (mg) | Area (m <sup>2</sup> ) | Pos. error area (m <sup>2</sup> ) | Neg. error area (m <sup>2</sup> ) | $k_{PSO}$ (mM <sup>-1</sup> *min <sup>-1</sup> ) | Error $k_{PSO}$ (mM <sup>-1</sup> *min <sup>-1</sup> ) | log $k_{PSO}$ | Pos. error log $k_2$ (-) | Neg. error log $k_2$ (-) |
|----------|------------------------|-----------------------------------|-----------------------------------|--------------------------------------------------|--------------------------------------------------------|---------------|--------------------------|--------------------------|
| 500      | 375                    | 14                                | 11                                | 30.5                                             | 0.5                                                    | 1.4843        | 0.01                     | 0.01                     |
| 625      | 469                    | 16                                | 13                                | 25.4                                             | 0.4                                                    | 1.4048        | 0.01                     | 0.01                     |
| 750      | 563                    | 19                                | 15                                | 25.8                                             | 0.6                                                    | 1.4116        | 0.02                     | 0.02                     |
| 875      | 656                    | 21                                | 17                                | 20.8                                             | 0.5                                                    | 1.3181        | 0.02                     | 0.02                     |
| 1000     | 750                    | 24                                | 19                                | 20.9                                             | 0.5                                                    | 1.3201        | 0.02                     | 0.02                     |

<sup>1</sup> Error in weighting and entry of GNP of estimated 5 mg results in 3.8 m<sup>2</sup> error in surface area. Errors smaller than 1.0 mM<sup>-1</sup> min<sup>-1</sup> are rounded up to 1.0 mM<sup>-1</sup> min<sup>-1</sup>.

**Table S17.5.** Error estimation for plotting log  $k_2$  of Cr(VI) sorption versus surface area of GNP. <sup>1</sup>

| GNP (mg) | Area (m <sup>2</sup> ) | Pos. error area (m <sup>2</sup> ) | Neg. error area (m <sup>2</sup> ) | $k_2$ (mM <sup>-1</sup> *min <sup>-1</sup> ) | Error (mM <sup>-1</sup> *min <sup>-1</sup> ) | log $k_2$ | Pos. error log $k_2$ (-) | Neg. error log $k_2$ (-) |
|----------|------------------------|-----------------------------------|-----------------------------------|----------------------------------------------|----------------------------------------------|-----------|--------------------------|--------------------------|
| 250      | 188                    | 9                                 | 9                                 | 1.25                                         | 0.10                                         | 0.0969    | 0.07                     | 0.07                     |
| 325      | 244                    | 10                                | 10                                | 2.20                                         | 0.14                                         | 0.3424    | 0.06                     | 0.05                     |
| 500      | 375                    | 14                                | 14                                | 6.35                                         | 0.24                                         | 0.8028    | 0.03                     | 0.03                     |
| 625      | 469                    | 16                                | 16                                | 12.1                                         | 0.20                                         | 1.0828    | 0.01                     | 0.01                     |
| 750      | 563                    | 19                                | 19                                | 24.1                                         | 0.3                                          | 1.3820    | 0.01                     | 0.01                     |
| 875      | 656                    | 21                                | 21                                | 48.2                                         | 1.0                                          | 1.6830    | 0.02                     | 0.02                     |

<sup>1</sup> Error in weighting and entry of GNP of estimated 5 mg results in 3.8 m<sup>2</sup> error in surface area. Errors smaller than 1.0 mM<sup>-1</sup> min<sup>-1</sup> are rounded up to 1.0 mM<sup>-1</sup> min<sup>-1</sup>.

**Table S17.6.** Error estimation for plotting  $k_1$  of Mn(VII) sorption versus surface area of GNP. <sup>1</sup>

| GNP (mg) | Area (m <sup>2</sup> ) | Error area (m <sup>2</sup> ) | $k_1$ (min <sup>-1</sup> ) | Error (mM <sup>-1</sup> *min <sup>-1</sup> ) | log (area) | Neg. error log area (-) | Pos. error log area (-) | log $k_1$ | Neg. error log $k_1$ (-) | Pos. error log $k_1$ (-) |
|----------|------------------------|------------------------------|----------------------------|----------------------------------------------|------------|-------------------------|-------------------------|-----------|--------------------------|--------------------------|
| 10       | 7.5                    | 1.2                          | 0.333                      | 0.0792                                       | 0.875      | 0.076                   | 0.064                   | -0.478    | 0.118                    | 0.093                    |
| 20       | 15.0                   | 1.4                          | 0.924                      | 0.1461                                       | 1.176      | 0.043                   | 0.039                   | -0.034    | 0.075                    | 0.064                    |
| 30       | 22.5                   | 1.6                          | 1.74                       | 0.2041                                       | 1.352      | 0.032                   | 0.030                   | 0.241     | 0.054                    | 0.048                    |
| 40       | 30.0                   | 1.8                          | 2.72                       | 0.2553                                       | 1.477      | 0.027                   | 0.025                   | 0.435     | 0.043                    | 0.039                    |
| 50       | 37.5                   | 2.0                          | 3.92                       | 0.3010                                       | 1.574      | 0.024                   | 0.023                   | 0.593     | 0.035                    | 0.032                    |

<sup>1</sup> Error in weighting and entry of GNP of estimated 1 mg results in 0.8 m<sup>2</sup> error in surface area.

### S18. Simultaneous sorption of V(V) and Cr(VI) on GNP.

**Table S18.** Simultaneous kinetics of 0.04 mM  $\text{NH}_4\text{VO}_3$  and 0.04 mM  $\text{K}_2\text{CrO}_4$  in DW, 510.9 mg GNP.

| Time (min) | Abs. 263 nm | Abs. 263 nm corr. | Abs. 375 nm | c( $\text{VO}_3$ ) corr. (mM) | c( $\text{CrO}_4$ ) (mM) | 1/c( $\text{VO}_3$ ) (1/mM) | 1/c( $\text{CrO}_4$ ) (1/mM) | q(t) $\text{VO}_3$ (mM min <sup>-1</sup> ) | 1/q(t) $\text{VO}_3$ (min/mM) |
|------------|-------------|-------------------|-------------|-------------------------------|--------------------------|-----------------------------|------------------------------|--------------------------------------------|-------------------------------|
| 0.0        | 1.002       | 0.330             | 0.922       | 0.040                         | 0.0400                   | 25.00                       | 25.00                        | 0.0000                                     |                               |
| 1.0        | 0.637       | 0.210             | 0.586       | 0.025                         | 0.0254                   | 39.33                       | 39.31                        | 0.0146                                     | 68.63                         |
| 1.8        | 0.554       | 0.214             | 0.467       | 0.026                         | 0.0203                   | 38.64                       | 49.30                        | 0.0141                                     | 70.84                         |
| 2.5        | 0.516       | 0.211             | 0.417       | 0.026                         | 0.0181                   | 39.04                       | 55.21                        | 0.0144                                     | 69.51                         |
| 3.2        | 0.486       | 0.208             | 0.382       | 0.025                         | 0.0166                   | 39.73                       | 60.35                        | 0.0148                                     | 67.43                         |
| 4.0        | 0.460       | 0.205             | 0.350       | 0.025                         | 0.0152                   | 40.30                       | 65.92                        | 0.0152                                     | 65.86                         |
| 6.0        | 0.416       | 0.198             | 0.298       | 0.024                         | 0.0129                   | 41.58                       | 77.34                        | 0.0159                                     | 62.70                         |
| 10.0       | 0.362       | 0.191             | 0.235       | 0.023                         | 0.0102                   | 43.24                       | 97.93                        | 0.0169                                     | 59.26                         |
| 15.0       | 0.322       | 0.185             | 0.188       | 0.022                         | 0.0082                   | 44.66                       | 122.4                        | 0.0176                                     | 56.79                         |
| 22.0       | 0.291       | 0.180             | 0.152       | 0.022                         | 0.0066                   | 45.88                       | 151.4                        | 0.0182                                     | 54.93                         |
| 30.0       | 0.255       | 0.175             | 0.110       | 0.021                         | 0.0048                   | 47.13                       | 209.0                        | 0.0188                                     | 53.24                         |

Spectra were recorded from 238 - 398 nm and the absorptions at 263 nm and 375 nm were evaluated.

Corrections were made for the V(V) absorption band using the fixed absorption band ratio of Cr(VI) at 263 and 375 nm of 0.7288. To do this, the time-dependent absorption band at 375 nm was multiplied by the factor and the corresponding value was subtracted from the band at 263 nm to obtain the absorption of V(V).

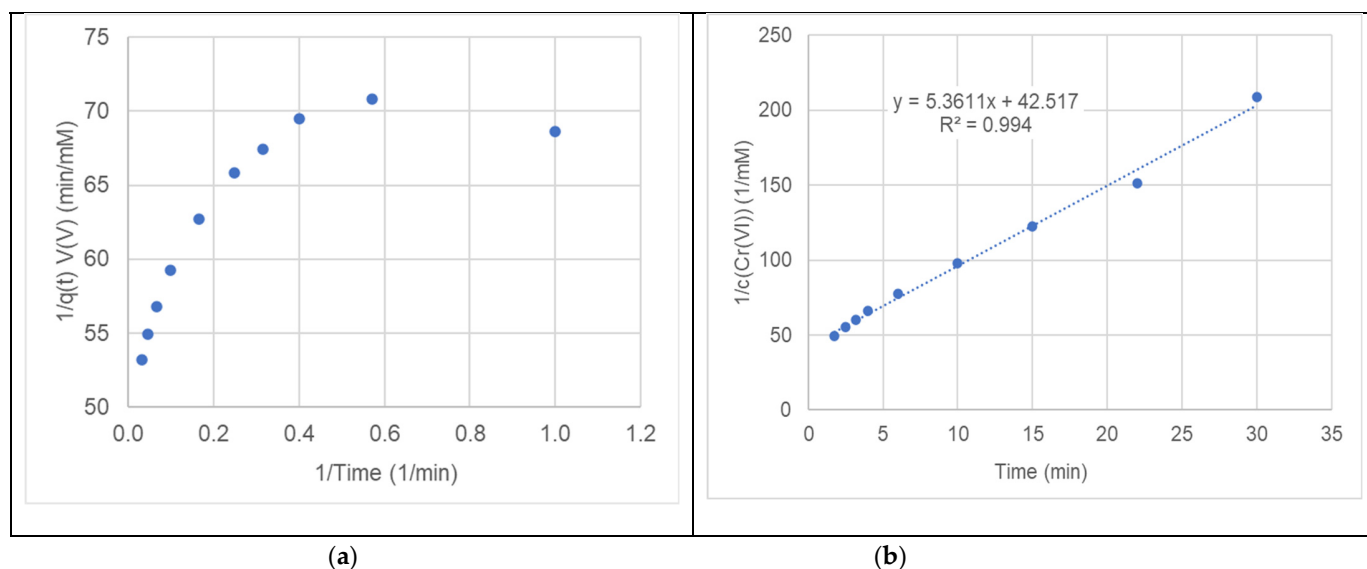

**Figure S18.** Concurrent sorption of V(V) and Cr(VI). (a) PSO plot for V(V); (b) Pseudo-second-order plot for Cr(VI).

# S19. XRD of the reaction product of GNP with manganese(VII).

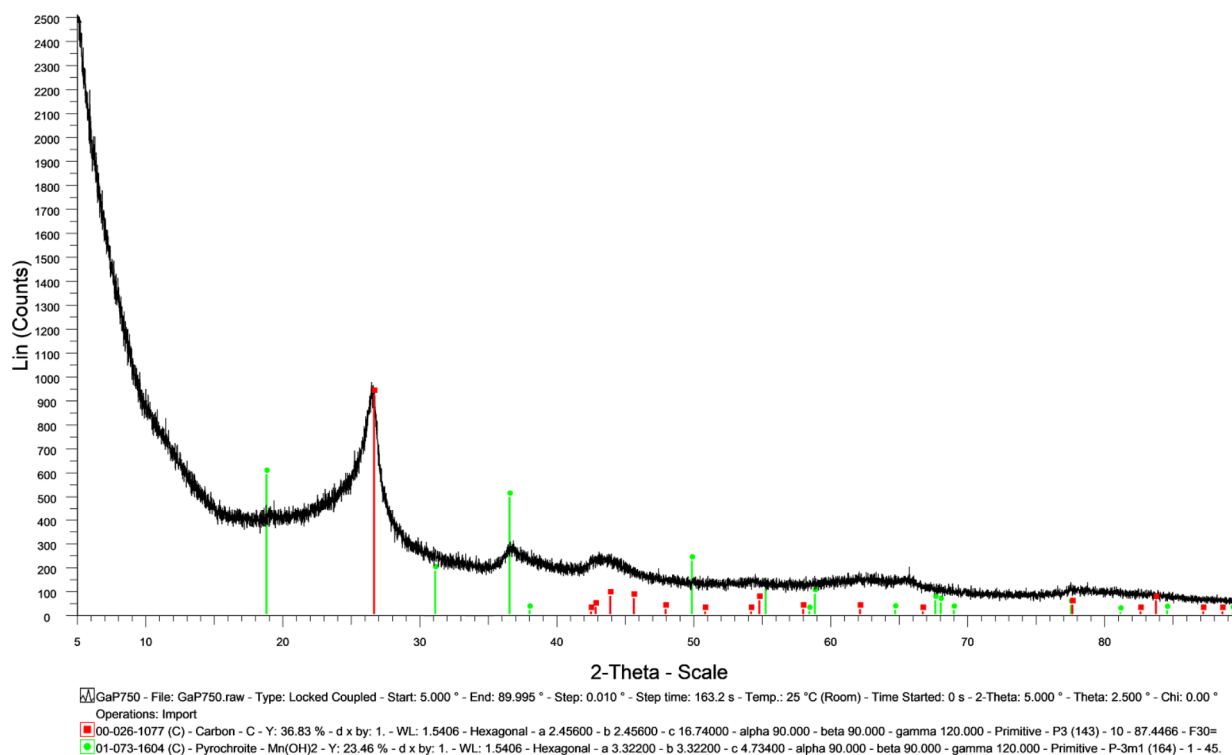

Figure S19. XRD of Mn-GNP.



**S20. ORP measurements of 0.04 mM oxometalate in drinking water.**

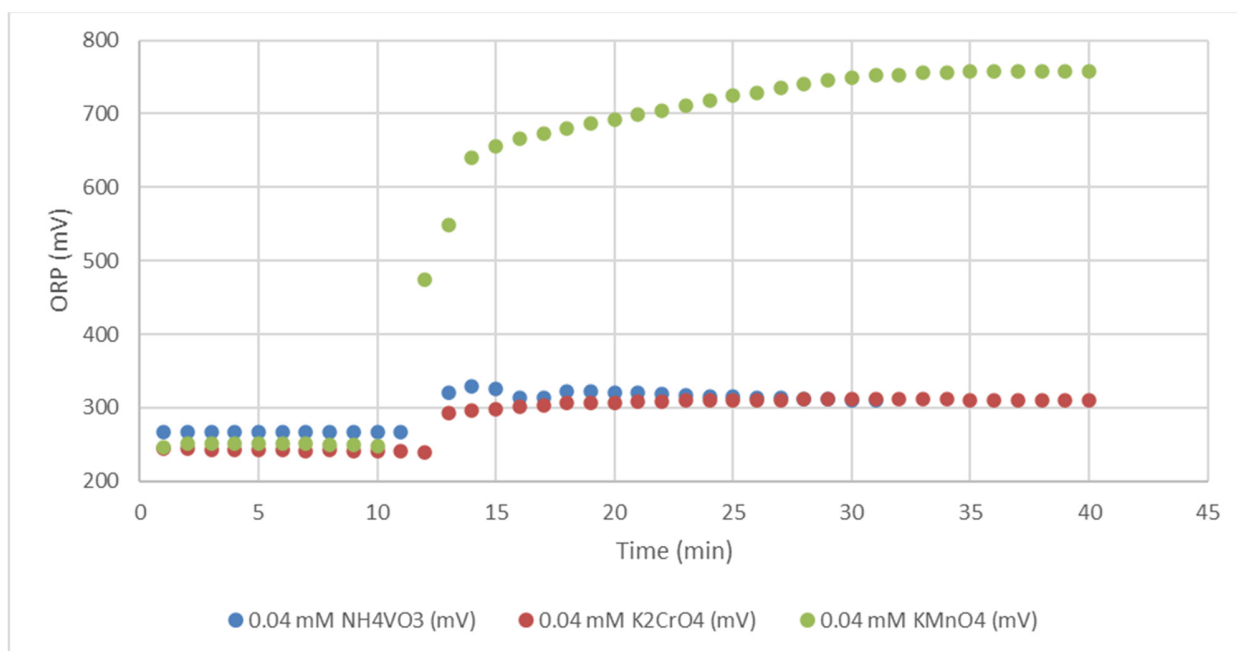

**Figure S20.** Time-dependent ORP measurements before and after dosage of 0.04 mM oxometalate in air-saturated DW with stirring (200 rpm), temperature  $22.2 \pm 1.2$  °C.
